# Supplementary material for: Epidemiological factors associated with the absence of previous HIV testing among HIV-positive persons in Singapore, 2012–2017
Source: PubMed Central journal article supplement — BMJ Open. 2021 Aug 17;11(8):e050133. doi: 10.1136/bmjopen-2021-050133 (PMC8372883; doi:10.1136/bmjopen-2021-050133), 2021-08-17
Supplement: bmjopen-2021-050133.draft_revisions.pdf [file bmjopen-2021-050133.draft_revisions.pdf]

# BMJ Open

BMJ Open is committed to open peer review. As part of this commitment we make the peer review history of every article we publish publicly available.

When an article is published we post the peer reviewers' comments and the authors' responses online. We also post the versions of the paper that were used during peer review. These are the versions that the peer review comments apply to.

The versions of the paper that follow are the versions that were submitted during the peer review process. They are not the versions of record or the final published versions. They should not be cited or distributed as the published version of this manuscript.

BMJ Open is an open access journal and the full, final, typeset and author-corrected version of record of the manuscript is available on our site with no access controls, subscription charges or pay-per-view fees (<http://bmjopen.bmj.com>).

If you have any questions on BMJ Open's open peer review process please email [info.bmjopen@bmj.com](mailto:info.bmjopen@bmj.com)

# BMJ Open

**Missed opportunities for early HIV diagnosis:  
Epidemiological factors associated with the absence of  
previous HIV testing among HIV-infected persons in  
Singapore, 2012 to 2017**

|                               |                                                                                                                                                                                                                                                                                                                                                                                                                                                 |
|-------------------------------|-------------------------------------------------------------------------------------------------------------------------------------------------------------------------------------------------------------------------------------------------------------------------------------------------------------------------------------------------------------------------------------------------------------------------------------------------|
| Journal:                      | <i>BMJ Open</i>                                                                                                                                                                                                                                                                                                                                                                                                                                 |
| Manuscript ID                 | bmjopen-2021-050133                                                                                                                                                                                                                                                                                                                                                                                                                             |
| Article Type:                 | Original research                                                                                                                                                                                                                                                                                                                                                                                                                               |
| Date Submitted by the Author: | 11-Feb-2021                                                                                                                                                                                                                                                                                                                                                                                                                                     |
| Complete List of Authors:     | Ang, Li Wei; National Centre for Infectious Diseases, Toh, Matthias Paul Han Sim; National Centre for Infectious Diseases Boudville, Irving; National Centre for Infectious Diseases Wong, Chen Seong; National Centre for Infectious Diseases Archuleta, Sophia; National Centre for Infectious Diseases Lee, Vernon; Ministry of Health, Singapore Chow, Angela; Tan Tock Seng Hospital Leo, Yee-Sin; National Centre for Infectious Diseases |
| Keywords:                     | Epidemiology < INFECTIOUS DISEASES, HIV & AIDS < INFECTIOUS DISEASES, Public health < INFECTIOUS DISEASES                                                                                                                                                                                                                                                                                                                                       |
|                               |                                                                                                                                                                                                                                                                                                                                                                                                                                                 |

SCHOLARONE™  
Manuscripts

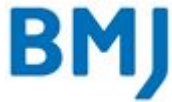

I, the Submitting Author has the right to grant and does grant on behalf of all authors of the Work (as defined in the below author licence), an exclusive licence and/or a non-exclusive licence for contributions from authors who are: i) UK Crown employees; ii) where BMJ has agreed a CC-BY licence shall apply, and/or iii) in accordance with the terms applicable for US Federal Government officers or employees acting as part of their official duties; on a worldwide, perpetual, irrevocable, royalty-free basis to BMJ Publishing Group Ltd ("BMJ") its licensees and where the relevant Journal is co-owned by BMJ to the co-owners of the Journal, to publish the Work in this journal and any other BMJ products and to exploit all rights, as set out in our [licence](#).

The Submitting Author accepts and understands that any supply made under these terms is made by BMJ to the Submitting Author unless you are acting as an employee on behalf of your employer or a postgraduate student of an affiliated institution which is paying any applicable article publishing charge ("APC") for Open Access articles. Where the Submitting Author wishes to make the Work available on an Open Access basis (and intends to pay the relevant APC), the terms of reuse of such Open Access shall be governed by a Creative Commons licence – details of these licences and which [Creative Commons](#) licence will apply to this Work are set out in our licence referred to above.

Other than as permitted in any relevant BMJ Author's Self Archiving Policies, I confirm this Work has not been accepted for publication elsewhere, is not being considered for publication elsewhere and does not duplicate material already published. I confirm all authors consent to publication of this Work and authorise the granting of this licence.

1  
2  
3  
4  
5  
6  
7  
8  
9

## Missed opportunities for early HIV diagnosis: Epidemiological factors associated with the absence of previous HIV testing among HIV-infected persons in Singapore, 2012 to 2017

10  
11  
12  
13  
14  
15

Li Wei Ang<sup>1\*</sup>, Matthias Paul Han Sim Toh<sup>1,2</sup>, Irving Charles Boudville<sup>1</sup>, Chen Seong Wong<sup>3,4,5</sup>, Sophia Archuleta<sup>3,5,6</sup>, Vernon Jian Ming Lee<sup>2,7</sup>, Angela Chow<sup>1,2,8,9</sup>, Yee Sin Leo<sup>2,4,5,8,10</sup>

- 16  
17  
18  
19  
20  
21  
22  
23  
24  
25  
26  
27  
28  
29  
30  
31  
32  
33  
34  
35
1. National Public Health and Epidemiology Unit, National Centre for Infectious Diseases, Singapore
  2. Saw Swee Hock School of Public Health, National University of Singapore, Singapore
  3. National HIV Programme, National Centre for Infectious Diseases, Singapore
  4. Department of Infectious Diseases, Tan Tock Seng Hospital, Singapore
  5. Yong Loo Lin School of Medicine, National University of Singapore, Singapore
  6. Division of Infectious Diseases, Department of Medicine, National University Hospital, National University Health System, Singapore
  7. Communicable Diseases Division, Ministry of Health, Singapore
  8. Lee Kong Chian School of Medicine, Nanyang Technological University, Singapore
  9. Department of Clinical Epidemiology, Office of Clinical Epidemiology, Analytics, and Knowledge (OCEAN), Tan Tock Seng Hospital, Singapore
  10. National Centre for Infectious Diseases, Singapore

36  
37

<sup>§</sup> Corresponding author: Li Wei Ang

38  
39

National Centre for Infectious Diseases, 16 Jalan Tan Tock Seng, Singapore 308442

40  
41

Tel: +65 63596950

42  
43  
44  
45  
46  
47  
48  
49  
50  
51  
52  
53  
54  
55  
56  
57  
58  
59  
60

Email: [Li\\_Wei\\_Ang@ncid.sg](mailto:Li_Wei_Ang@ncid.sg)

## ABSTRACT

**Objective:** To assess temporal trend and identify risk factors associated with the absence of previous HIV testing prior to their diagnosis among HIV/AIDS cases in Singapore.

**Study design:** Cross-sectional.

**Setting and participants:** We analyzed data of HIV/AIDS cases infected via sexual transmission, who were notified to the National HIV Registry in 2012–2017.

**Outcomes:** Epidemiological factors associated with the absence of HIV testing prior to diagnosis were determined separately for two groups: early and late stages of HIV infection at diagnosis.

**Results:** 2,188 cases with information on HIV testing history and CD4 cell count were included in the study. The median age at HIV diagnosis was 40 years (interquartile range [IQR], 30–51). Nearly half (45.1%) had never been tested for HIV prior to their diagnosis. The most common reason cited for no previous HIV testing was “not necessary to test” (73.7%). Among cases with previous tests, the median duration from the last negative test to HIV diagnosis was 2.1 years (IQR 1.0–4.4). The time interval was significantly longer at 3.8 years (IQR 2.0–7.3) among cases diagnosed at late-stage HIV infection compared with 1.7 years (IQR 0.8–3.2) among those diagnosed at early-stage. Anonymous test sites were most popular (32.1%), followed by primary care clinics (23.3%). The proportion diagnosed at late-stage HIV infection was significantly higher among cases who had never been tested for HIV (63.9%) compared with those who had undergone previous HIV tests (29.0%). Common risk factors associated with no previous HIV testing in these two groups were: older age at HIV diagnosis, lower educational level, detection via medical care, and HIV infection via heterosexual transmission.

1  
2 **Conclusion:** Targeted prevention efforts and strategies are needed to raise the level  
3  
4 of awareness of HIV/AIDS and to encourage early and regular screening among the  
5  
6 at-risk groups by making HIV testing more accessible.  
7  
8  
9  
10  
11

12 (Word count: 294)  
13  
14  
15

16 **Keywords:** late-stage, HIV testing; risk factors, screening  
17  
18  
19  
20  
21  
22  
23  
24  
25  
26  
27  
28  
29  
30  
31  
32  
33  
34  
35  
36  
37  
38  
39  
40  
41  
42  
43  
44  
45  
46  
47  
48  
49  
50  
51  
52  
53  
54  
55  
56  
57  
58  
59  
60

## ARTICLE SUMMARY

### Strengths and limitations of this study

- We were able to use the epidemiological data collected in the National HIV Registry in Singapore, which improves the generalisability of the findings.
- The cross-sectional design of our study did not allow us to make inference about the causality of having had no previous HIV testing and the associated factors.
- Not all potential confounding factors associated with absence of prior HIV testing prior to HIV diagnosis could be included in our study, and information on drivers and barriers of HIV testing was unavailable
- As testing-related variables were ascertained based on self-reporting by HIV/AIDS cases, some extent of misclassification due to recall bias could not be avoided.

view only

## INTRODUCTION

Regular HIV testing among at-risk individuals is paramount as a preventive strategy in the programmatic response to HIV/AIDS epidemic. In recognition of the major consequences of undiagnosed HIV infection, the Joint United Nations Programme on HIV/AIDS (UNAIDS) and partners launched the 90–90–90 targets in 2014, which called for 90% of all people living with HIV (PLHIV) to be aware of their status, 90% of those diagnosed to receive antiretroviral therapy (ART), and 90% of those on ART to achieve viral suppression by 2020.<sup>1</sup> The corresponding estimates for PLHIV in Singapore were 80%, 91% and 91% in 2018.<sup>2</sup> Regular and frequent HIV testing provides an essential gateway to serostatus awareness and early diagnosis, thereby enhancing the effectiveness of all subsequent steps in the cascade of HIV care including provision of ART and counselling on behaviour. The risk of onward transmission by persons who are unaware of their HIV infection and premature deaths is also reduced with diagnosis of HIV infection at an early stage.

As of end-2019, there were 8,618 Singapore residents diagnosed with HIV infection, of whom 2,097 had died.<sup>3</sup> Despite the widespread availability and accessibility of HIV testing in Singapore, late diagnosis in the course of HIV infection continues to be a barrier in tackling HIV.<sup>4</sup> A local study revealed that over half (54%) of HIV-positive persons infected via sexual transmission in 1996–2009 had late-stage disease at diagnosis.<sup>5</sup> The higher short-term mortality of persons diagnosed with late-stage HIV infection underscores the importance of testing and detection at the earliest opportunity.<sup>6</sup> Another local study found that the median survival of HIV cases diagnosed late was 5 years, whereas the cumulative proportion of those diagnosed early surviving until the fifth year since diagnosis was 80%.<sup>7</sup>

This study seeks to elucidate epidemiological factors associated with the absence of previous HIV testing prior to their diagnosis among cases diagnosed at both early and late stages of HIV infection. The findings provide insights into



1 reviewing and tailoring public health preventive and interventional strategies to  
2 increase the uptake of HIV testing in at-risk groups, so as to reduce missed  
3  
4 opportunities for early diagnosis and facilitate timely initiation of ART for HIV-infected  
5  
6 persons.  
7  
8  
9

## 10 11 12 13 **MATERIALS AND METHODS**

### 14 15 **Study population**

16  
17 Notification of HIV/AIDS diagnosis is mandatory under the Infectious Diseases  
18 Act in Singapore<sup>8</sup>. Information collected in the National HIV Registry is protected  
19 under the law, and includes socio-demographic characteristics, CD4 cell count, mode  
20 of detection and exposure factors such as the mode of transmission and the type of  
21 sexual partners.  
22  
23  
24  
25  
26  
27  
28

29 Data on self-reported history of HIV testing has been collected since 2010,  
30 and the proportion of missing data dropped from 39% in 2010 to below 20% since  
31 2012. The majority (95.1%) of all HIV/AIDS cases reported in 1985–2017 were  
32 infected via sexual transmission, hence we restricted the analyses to those infected  
33 via sexual transmission to allow for a more homogenous group. The study population  
34 were sexually transmitted HIV/AIDS cases diagnosed and notified to the National HIV  
35 Registry in 2012–2017. Approval for this study was provided by the Ministry of  
36 Health, Singapore. As the data was collected under the Infectious Diseases Act and  
37 analyses were performed on an anonymized dataset, informed consent was not  
38 required for this study.  
39  
40  
41  
42  
43  
44  
45  
46  
47  
48  
49  
50  
51

52 The analyses were stratified by stage of HIV infection at diagnosis (early or  
53 late), hence HIV/AIDS cases with either unknown HIV testing history or missing CD4  
54 count at diagnosis were excluded. Late-stage HIV infection was defined as having  
55 either a CD4 count  $<200$  cells/mm<sup>3</sup> at the time of diagnosis, or an AIDS-defining  
56 illness at diagnosis or within one year of HIV diagnosis.<sup>5</sup> We excluded cases whose  
57  
58  
59  
60

1 first available date of CD4 count was more than 90 days after their HIV diagnosis  
2 date as they would most likely to have started treatment on their first date of CD4  
3  
4  
5  
6 count, hence whether these cases had late-stage infection or not was unknown.  
7  
8  
9

## 10 **Patient and public involvement**

11 Patients and/or the public were not involved in the design, or conduct, or reporting, or  
12  
13 dissemination plans of the study results.  
14  
15  
16

## 17 **Statistical analysis**

18 Changes in proportions over time were analysed using the Chi-square test for  
19 trend. The Chi-square test or Fisher's exact test, where appropriate, was used for  
20 comparison of categorical variables. The Mann-Whitney U test was used to assess  
21 differences between any two groups for continuous variables. For variables with  
22 missing data proportion less than 10%, we used missForest (version 1.4), an iterative  
23 non-parametric method, to impute the missing values.<sup>9</sup>  
24  
25  
26  
27  
28  
29  
30  
31  
32  
33  
34  
35

36 The main outcome was whether the person had previous HIV tests prior to  
37 diagnosis. Crude odds ratios (OR) and adjusted odds ratio (aOR) along with 95%  
38 confidence interval (CI) were calculated based on logistic regression models.  
39  
40  
41  
42  
43  
44  
45  
46  
47  
48  
49  
50  
51  
52  
53  
54  
55  
56  
57  
58  
59  
60

All  $p$  values reported were 2-sided and statistical significance was taken as  $p$   
<0.05. Statistical analyses were performed using SPSS version 24 (IBM, USA) and R  
version 3.5.0 (R Foundation for Statistical Computing, Vienna, Austria).

## RESULTS

A total of 2,579 new HIV/AIDS cases infected via sexual transmission were notified to the National HIV Registry in 2012–2017. We excluded 391 cases from this study; 282 had unknown HIV testing history and another 109 did not have CD4 cell counts measured at diagnosis. Among the 2,188 cases included in the study, 45.1% had no previous HIV testing prior to diagnosis. There was a significant decline in the annual proportion of cases with no previous HIV testing; from 53.6% in 2012 to 40.1% in 2017 ( $p < 0.0005$ ) (Fig. 1). The annual proportion without previous HIV testing was consistently higher in cases diagnosed at late-stage than early-stage of HIV infection.

The median age of the 2,188 HIV/AIDS cases was 40 years (interquartile range [IQR], 30–51). About 93.5% of the cases were men, 71.8% were Chinese, 68.8% had never been married, 67.0% had attained post-secondary education or diploma levels (67.0%), and 62.5% worked in professional/managerial positions or administrative/service sectors (Table 1). About 45.7% of the cases were detected during the course of medical care wherein HIV testing was performed as part of the diagnostic evaluation for their presenting symptoms, while 28.1% were detected via routine programmatic HIV screening which included screening programmes for those with sexually transmitted infections (STIs), hospital inpatients and those identified through contact tracing. Over half of the cases were infected via homosexual/bisexual route of transmission (58.8%), had regular and casual sexual partners only (62.0%), were diagnosed at early-stage HIV infection (55.3%), and did not have any self-reported history of STIs (76.2%).

Compared with cases who had previous HIV testing, a significantly higher proportion of cases without previous testing were aged 45 years or older at HIV diagnosis (59.7% vs. 21.0%), women (10.6% vs. 3.2%), had ever been married

(48.9% vs. 16.6%), had a secondary education or below (29.3% vs. 11.2%), and were blue-collar workers (23.0% vs. 4.8%) or unemployed (4.4% vs. 2.2%) (Table 1). A significantly higher proportion of cases without previous HIV tests were diagnosed in the course of medical care (65.5% vs. 29.5%), infected via heterosexual transmission (64.1% vs. 22.4%), and had sex workers and social escorts as sexual partners (39.0% vs. 15.9%). The proportion without any self-reported history of STIs was significantly higher among cases without previous tests than in those who had ever been tested for HIV prior to diagnosis (81.0% vs. 72.3%). The proportion of late-stage HIV infection among cases without previous tests was about two times that of those with previous HIV tests (63.9% vs. 29.0%).

**Table 1. Characteristics (%) of sexually transmitted HIV/AIDS cases by history of HIV testing prior to diagnosis in Singapore, 2012–2017.**

| Characteristic              | Total<br>(N=2,188) | No<br>previous<br>HIV tests<br>(N=986) | Had<br>previous<br>HIV tests<br>(N=1,202) | P-value |
|-----------------------------|--------------------|----------------------------------------|-------------------------------------------|---------|
|                             | n (%)              | n (%)                                  | n (%)                                     |         |
| Age group (years)           |                    |                                        |                                           | <0.0005 |
| 15–24                       | 231 (10.6)         | 59 (6.0)                               | 172 (14.3)                                |         |
| 25–34                       | 548 (25.0)         | 138 (14.0)                             | 410 (34.1)                                |         |
| 35–44                       | 567 (25.9)         | 200 (20.3)                             | 367 (30.5)                                |         |
| 45–54                       | 487 (22.3)         | 303 (30.7)                             | 184 (15.3)                                |         |
| 55–64                       | 274 (12.5)         | 211 (21.4)                             | 63 (5.2)                                  |         |
| ≥65                         | 81 (3.7)           | 75 (7.6)                               | 6 (0.5)                                   |         |
| Gender                      |                    |                                        |                                           | <0.0005 |
| Male                        | 2045 (93.5)        | 881 (89.4)                             | 1164 (96.8)                               |         |
| Female                      | 143 (6.5)          | 105 (10.6)                             | 38 (3.2)                                  |         |
| Ethnic group                |                    |                                        |                                           | 0.092   |
| Chinese                     | 1571 (71.8)        | 700 (71.0)                             | 871 (72.5)                                |         |
| Malay                       | 413 (18.9)         | 193 (19.6)                             | 220 (18.3)                                |         |
| Indian                      | 122 (5.6)          | 64 (6.5)                               | 58 (4.8)                                  |         |
| Others                      | 82 (3.7)           | 29 (2.9)                               | 53 (4.4)                                  |         |
| Marital status              |                    |                                        |                                           | <0.0005 |
| Never married               | 1506 (68.8)        | 504 (51.1)                             | 1002 (83.4)                               |         |
| Married                     | 469 (21.4)         | 326 (33.1)                             | 143 (11.9)                                |         |
| Separated/Divorced/Widowed  | 213 (9.7)          | 156 (15.8)                             | 57 (4.7)                                  |         |
| Educational level           |                    |                                        |                                           | <0.0005 |
| No formal / Primary         | 161 (7.4)          | 129 (13.1)                             | 32 (2.7)                                  |         |
| Secondary                   | 263 (12.0)         | 160 (16.2)                             | 103 (8.6)                                 |         |
| Post-secondary / Diploma    | 1466 (67.0)        | 630 (63.9)                             | 836 (69.6)                                |         |
| University degree or higher | 290 (13.3)         | 63 (6.4)                               | 227 (18.9)                                |         |
| Unknown                     | 8 (0.4)            | 4 (0.4)                                | 4 (0.3)                                   |         |

| Characteristic                                  | Total<br>(N=2,188) | No<br>previous<br>HIV tests<br>(N=986) | Had<br>previous<br>HIV tests<br>(N=1,202) | P-value |
|-------------------------------------------------|--------------------|----------------------------------------|-------------------------------------------|---------|
| Occupational type                               |                    |                                        |                                           | <0.0005 |
| Professional / executive                        | 463 (21.2)         | 155 (15.7)                             | 308 (25.6)                                |         |
| Administrative / service                        | 904 (41.3)         | 380 (38.5)                             | 524 (43.6)                                |         |
| Blue-collar worker                              | 285 (13.0)         | 227 (23.0)                             | 58 (4.8)                                  |         |
| Unemployed                                      | 69 (3.2)           | 43 (4.4)                               | 26 (2.2)                                  |         |
| Others                                          | 302 (13.8)         | 112 (11.4)                             | 190 (15.8)                                |         |
| Unknown                                         | 165 (7.5)          | 69 (7.0)                               | 96 (8.0)                                  |         |
| Mode of detection                               |                    |                                        |                                           | <0.0005 |
| Voluntary screening                             | 452 (20.7)         | 69 (7.0)                               | 383 (31.9)                                |         |
| Medical care                                    | 1001 (45.7)        | 646 (65.5)                             | 355 (29.5)                                |         |
| Routine programmatic HIV screening <sup>‡</sup> | 615 (28.1)         | 241 (24.4)                             | 374 (31.1)                                |         |
| Others                                          | 120 (5.5)          | 30 (3.0)                               | 90 (7.5)                                  |         |
| Mode of HIV transmission                        |                    |                                        |                                           | <0.0005 |
| Homosexual/bisexual                             | 1287 (58.8)        | 354 (35.9)                             | 933 (77.6)                                |         |
| Heterosexual                                    | 901 (41.2)         | 632 (64.1)                             | 269 (22.4)                                |         |
| Type of sexual partners                         |                    |                                        |                                           | <0.0005 |
| Regular only                                    | 246 (11.2)         | 126 (12.8)                             | 120 (10.0)                                |         |
| Regular and casual only                         | 1357 (62.0)        | 471 (47.8)                             | 886 (73.7)                                |         |
| Sex workers and social escorts                  | 576 (26.3)         | 385 (39.0)                             | 191 (15.9)                                |         |
| Unknown                                         | 9 (0.4)            | 4 (0.4)                                | 5 (0.4)                                   |         |
| Self-reported history of STIs                   |                    |                                        |                                           | <0.0005 |
| No                                              | 1668 (76.2)        | 799 (81.0)                             | 869 (72.3)                                |         |
| Yes                                             | 520 (23.8)         | 187 (19.0)                             | 333 (27.7)                                |         |
| Stage of HIV infection                          |                    |                                        |                                           | <0.0005 |
| Early                                           | 1210 (55.3)        | 356 (36.1)                             | 854 (71.0)                                |         |
| Late                                            | 978 (44.7)         | 630 (63.9)                             | 348 (29.0)                                |         |

STIs, sexually transmitted infections.

<sup>‡</sup> Routine programmatic HIV screening includes screening programmes for those with STIs, hospital inpatients and those identified through contact tracing.

Among the 1,202 cases who had previous HIV tests, 1,122 (93.3%) reported a negative result for the last test prior to diagnosis and their median duration from the last negative test to HIV diagnosis was 2.1 years (IQR 1.0–4.4). This interval was significantly longer at 3.8 years (IQR 2.0–7.3) among the 320 cases diagnosed at late-stage HIV infection compared with 1.7 years (IQR 0.8–3.2) among the 802 cases diagnosed early ( $p < 0.0005$ ) (Fig. 2).

Popular test sites among cases with previous HIV tests were anonymous test sites (32.1%), primary care clinics (23.3%) and the Department of STI Control (DSC) Clinic, a specialist outpatient clinic for the diagnosis, treatment and control of STIs (12.8%). The median duration from the last negative test to HIV diagnosis was 1.5

1 years (IQR 0.7–2.9) at anonymous test sites, compared with 2.5 years (IQR 1.2–5.2)  
2  
3  
4 at other test sites ( $p < 0.0005$ ).  
5

6 About 49.4% of the 360 cases who previously tested negative at anonymous  
7  
8 test sites were subsequently diagnosed with HIV via voluntary outpatient screening,  
9  
10 while the rest were diagnosed via medical care or routine programmatic HIV  
11  
12 screening. About 79.4% of these cases had early-stage HIV infection at diagnosis.  
13  
14 Among HIV/AIDS cases who had previous HIV tests, the proportion last tested  
15  
16 negative at anonymous test sites was significantly higher in those diagnosed at early-  
17  
18 stage than late-stage of HIV infection (35.7% vs 23.1%) ( $p < 0.0005$ ) (Fig. 3).  
19  
20  
21

22 The most common reason cited by cases who did not have any previous HIV  
23  
24 testing prior to diagnosis was “not necessary to test” (73.7%), followed by “does not  
25  
26 want to know status” (8.1%) and “fear of stigmatisation / rejection” (4.5%). There was  
27  
28 a significantly higher proportion of cases diagnosed late (76.3%) who cited “not  
29  
30 necessary to test” compared with those diagnosed early (69.1%) ( $p = 0.01$ ) (Fig. 4).  
31  
32  
33

34 Four factors were independently associated with no previous HIV testing  
35  
36 among cases diagnosed at late-stage of infection: older age at HIV diagnosis ( $\geq 55$   
37  
38 years vs 15–24 years), lower educational level (vs university degree or higher),  
39  
40 detection via medical care (vs voluntary screening), and HIV infection via  
41  
42 heterosexual transmission (vs homosexual/bisexual transmission) (Table 2). The  
43  
44 following six factors were independently associated with no previous HIV testing  
45  
46 among cases diagnosed at early-stage: older age at HIV diagnosis ( $\geq 45$  years vs 15–  
47  
48 24 years), women, Malays (vs Chinese), lower educational level (vs university degree  
49  
50 or higher), detection via medical care and routine programmatic HIV screening (vs  
51  
52 voluntary screening), and HIV infection via heterosexual transmission (vs  
53  
54 homosexual/bisexual transmission) (Table 3).  
55  
56  
57  
58  
59  
60

**Table 2. Proportion and odds ratios of absence of previous HIV testing in sexually transmitted HIV/AIDS cases diagnosed at late-stage HIV infection in Singapore, 2012–2017.**

| Characteristic                      | % without previous HIV testing | Univariable model |              |         | Multivariable model |              |         |
|-------------------------------------|--------------------------------|-------------------|--------------|---------|---------------------|--------------|---------|
|                                     |                                | cOR               | (95% CI)     | p value | aOR                 | (95% CI)     | p value |
| Age at diagnosis (years)            |                                |                   |              | <0.0005 |                     |              | <0.0005 |
| 15–24                               | 44.4                           | 1.00              | Referent     |         | 1.00                | Referent     |         |
| 25–34                               | 38.4                           | 0.78              | (0.34–1.78)  | 0.552   | 0.76                | (0.31–1.85)  | 0.546   |
| 35–44                               | 49.6                           | 1.23              | (0.55–2.73)  | 0.610   | 0.89                | (0.38–2.11)  | 0.794   |
| 45–54                               | 73.6                           | 3.48              | (1.56–7.76)  | 0.002   | 1.97                | (0.83–4.68)  | 0.126   |
| 55–64                               | 83.6                           | 6.37              | (2.72–14.92) | <0.0005 | 2.71                | (1.07–6.85)  | 0.035   |
| >65                                 | 93.4                           | 17.81             | (5.02–63.20) | <0.0005 | 6.14                | (1.60–23.50) | 0.008   |
| Gender                              |                                |                   |              |         |                     |              |         |
| Male                                | 62.8                           | 1.00              | Referent     |         |                     |              |         |
| Female                              | 83.1                           | 2.91              | (1.58–5.37)  | 0.001   |                     |              |         |
| Ethnic group                        |                                |                   |              | 0.087   |                     |              |         |
| Chinese                             | 65.6                           | 1.00              | Referent     |         |                     |              |         |
| Malay                               | 60.3                           | 0.80              | (0.57–1.12)  | 0.194   |                     |              |         |
| Indian                              | 73.3                           | 1.44              | (0.73–2.84)  | 0.290   |                     |              |         |
| Others                              | 50.0                           | 0.52              | (0.27–1.01)  | 0.053   |                     |              |         |
| Marital status                      |                                |                   |              | <0.0005 |                     |              |         |
| Single                              | 51.7                           | 1.00              | Referent     |         |                     |              |         |
| Married                             | 82.2                           | 4.30              | (3.02–6.13)  | <0.0005 |                     |              |         |
| Divorced/ separated/ widowed        | 81.3                           | 4.05              | (2.58–6.35)  | <0.0005 |                     |              |         |
| Educational level†                  |                                |                   |              | <0.0005 |                     |              | 0.039   |
| No formal / Primary                 | 88.9                           | 14.45             | (6.87–30.39) | <0.0005 | 3.23                | (1.40–7.46)  | 0.006   |
| Secondary                           | 66.9                           | 3.65              | (2.09–6.37)  | <0.0005 | 1.51                | (0.81–2.84)  | 0.195   |
| Post-secondary / Diploma            | 63.6                           | 3.16              | (1.98–5.04)  | <0.0005 | 1.75                | (1.03–2.96)  | 0.038   |
| University degree or higher         | 35.6                           | 1.00              | Referent     |         | 1.00                | Referent     |         |
| Occupational type†                  |                                |                   |              | <0.0005 |                     |              |         |
| Professional / executive            | 49.0                           | 1.00              | Referent     |         |                     |              |         |
| Administrative / service            | 58.7                           | 1.48              | (1.05–2.07)  | 0.023   |                     |              |         |
| Blue-collar worker                  | 84.5                           | 5.66              | (3.58–8.95)  | <0.0005 |                     |              |         |
| Unemployed                          | 80.4                           | 4.27              | (2.03–8.98)  | <0.0005 |                     |              |         |
| Others                              | 68.2                           | 2.23              | (1.31–3.81)  | 0.003   |                     |              |         |
| Mode of detection                   |                                |                   |              | <0.0005 |                     |              | <0.0005 |
| Voluntary screening                 | 26.7                           | 1.00              | Referent     |         | 1.00                | Referent     |         |
| Medical care                        | 72.7                           | 7.30              | (4.40–12.10) | <0.0005 | 4.15                | (2.35–7.33)  | <0.0005 |
| Routine programmatic HIV screening‡ | 54.1                           | 3.23              | (1.82–5.71)  | <0.0005 | 1.90                | (0.99–3.65)  | 0.054   |

| Characteristic                 | % without previous HIV testing | Univariable model |             |         | Multivariable model |             |         |
|--------------------------------|--------------------------------|-------------------|-------------|---------|---------------------|-------------|---------|
|                                |                                | cOR               | (95% CI)    | p value | aOR                 | (95% CI)    | p value |
| Others                         | 36.4                           | 1.57              | (0.67–3.68) | 0.304   | 0.89                | (0.34–2.34) | 0.819   |
| Mode of sexual transmission    |                                |                   |             |         |                     |             |         |
| Homosexual/bisexual            | 43.1                           | 1.00              | Referent    |         | 1.00                | Referent    |         |
| Heterosexual                   | 81.3                           | 5.76              | (4.32–7.67) | <0.0005 | 3.46                | (2.50–4.80) | <0.0005 |
| Type of sexual partner†        |                                |                   |             | <0.0005 |                     |             |         |
| Regular only                   | 74.5                           | 1.00              | Referent    |         |                     |             |         |
| Regular and casual only        | 52.9                           | 0.39              | (0.24–0.63) | <0.0005 |                     |             |         |
| Sex workers and social escorts | 78.8                           | 1.27              | (0.75–2.14) | 0.369   |                     |             |         |
| History of STIs                |                                |                   |             |         |                     |             |         |
| Yes                            | 57.7                           | 1.00              | Referent    |         |                     |             |         |
| No                             | 65.8                           | 1.41              | (1.00–1.98) | 0.048   |                     |             |         |

cOR, crude odds ratio; aOR, adjusted odds ratio; STIs, sexually transmitted infections.

† Routine programmatic HIV screening includes screening programmes for those with STIs, hospital inpatients and those identified through contact tracing.

‡ Missing data were imputed.

**Table 3. Proportion and odds ratios of absence of previous HIV testing in sexually transmitted HIV/AIDS cases diagnosed at early-stage HIV infection in Singapore, 2012–2017.**

| Characteristic           | % without previous HIV testing | Univariable model |               |         | Multivariable model |              |         |
|--------------------------|--------------------------------|-------------------|---------------|---------|---------------------|--------------|---------|
|                          |                                | cOR               | (95% CI)      | p value | aOR                 | (95% CI)     | p value |
| Age at diagnosis (years) |                                |                   |               | <0.0005 |                     |              | <0.0005 |
| 15–24                    | 23.0                           | 1.00              | Referent      |         | 1.00                | Referent     |         |
| 25–34                    | 20.4                           | 0.86              | (0.57–1.29)   | 0.453   | 1.07                | (0.69–1.67)  | 0.758   |
| 35–44                    | 23.5                           | 1.02              | (0.67–1.56)   | 0.909   | 1.07                | (0.67–1.71)  | 0.769   |
| 45–54                    | 44.1                           | 2.64              | (1.71–4.08)   | <0.0005 | 2.26                | (1.38–3.73)  | 0.001   |
| 55–64                    | 62.4                           | 5.53              | (3.20–9.56)   | <0.0005 | 3.18                | (1.70–5.96)  | <0.0005 |
| ≥65                      | 90.0                           | 30.06             | (6.73–134.30) | <0.0005 | 13.17               | (2.80–62.03) | 0.001   |
| Gender                   |                                |                   |               |         |                     |              |         |
| Male                     | 27.5                           | 1.00              | Referent      |         | 1.00                | Referent     |         |
| Female                   | 62.1                           | 4.32              | (2.58–7.22)   | <0.0005 | 2.07                | (1.13–3.78)  | 0.018   |
| Ethnic group             |                                |                   |               | 0.002   |                     |              | 0.004   |
| Chinese                  | 26.7                           | 1.00              | Referent      |         | 1.00                | Referent     |         |
| Malay                    | 36.8                           | 1.60              | (1.18–2.17)   | 0.002   | 1.76                | (1.24–2.50)  | 0.002   |
| Indian                   | 40.3                           | 1.85              | (1.14–2.99)   | 0.012   | 1.21                | (0.70–2.08)  | 0.499   |
| Others                   | 22.7                           | 0.81              | (0.39–1.66)   | 0.561   | 0.53                | (0.24–1.18)  | 0.119   |
| Marital status           |                                |                   |               | <0.0005 |                     |              |         |



| Characteristic                      | % without previous HIV testing | Univariable model |              |         | Multivariable model |             |         |
|-------------------------------------|--------------------------------|-------------------|--------------|---------|---------------------|-------------|---------|
|                                     |                                | cOR               | (95% CI)     | p value | aOR                 | (95% CI)    | p value |
| Single                              | 22.5                           | 1.00              | Referent     |         |                     |             |         |
| Married                             | 52.5                           | 3.80              | (2.77–5.22)  | <0.0005 |                     |             |         |
| Divorced/ separated/ widowed        | 56.5                           | 4.47              | (2.71–7.37)  | <0.0005 |                     |             |         |
| Educational level*                  |                                |                   |              | <0.0005 |                     | <0.0005     |         |
| No formal / Primary                 | 63.0                           | 8.81              | (4.52–17.15) | <0.0005 | 2.22                | (1.04–4.75) | 0.040   |
| Secondary                           | 53.0                           | 5.85              | (3.47–9.87)  | <0.0005 | 2.80                | (1.56–5.04) | 0.001   |
| Post-secondary / Diploma            | 27.2                           | 1.94              | (1.30–2.90)  | 0.001   | 1.15                | (0.74–1.79) | 0.538   |
| University degree or higher         | 16.2                           | 1.00              | Referent     |         | 1.00                | Referent    |         |
| Occupational type†                  |                                |                   |              | <0.0005 |                     |             |         |
| Professional / executive            | 21.4                           | 1.00              | Referent     |         |                     |             |         |
| Administrative / service            | 28.0                           | 1.43              | (1.02–2.00)  | 0.038   |                     |             |         |
| Blue-collar worker                  | 61.6                           | 5.88              | (3.67–9.43)  | <0.0005 |                     |             |         |
| Unemployed                          | 36.8                           | 2.14              | (1.05–4.37)  | 0.037   |                     |             |         |
| Others                              | 26.0                           | 1.29              | (0.86–1.93)  | 0.223   |                     |             |         |
| Mode of detection                   |                                |                   |              | <0.0005 |                     | <0.0005     |         |
| Voluntary screening                 | 12.6                           | 1.00              | Referent     |         | 1.00                | Referent    |         |
| Medical care                        | 45.5                           | 5.81              | (3.96–8.53)  | <0.0005 | 3.66                | (2.39–5.59) | <0.0005 |
| Routine programmatic HIV screening‡ | 34.0                           | 3.58              | (2.49–5.16)  | <0.0005 | 2.66                | (1.79–3.95) | <0.0005 |
| Others                              | 20.7                           | 1.81              | (0.99–3.32)  | 0.053   | 1.41                | (0.74–2.70) | 0.294   |
| Mode of sexual transmission         |                                |                   |              |         |                     |             |         |
| Homosexual/bisexual                 | 19.6                           | 1.00              | Referent     |         | 1.00                | Referent    |         |
| Heterosexual                        | 53.0                           | 4.60              | (3.52–6.02)  | <0.0005 | 2.17                | (1.55–3.04) | <0.0005 |
| Type of sexual partner†             |                                |                   |              | <0.0005 |                     |             |         |
| Regular only                        | 36.0                           | 1.00              | Referent     |         |                     |             |         |
| Regular and casual only             | 23.3                           | 0.54              | (0.37–0.78)  | 0.001   |                     |             |         |
| Sex workers and social escorts      | 47.8                           | 1.63              | (1.06–2.48)  | 0.025   |                     |             |         |
| History of STIs                     |                                |                   |              |         |                     |             |         |
| Yes                                 | 25.6                           | 1.00              | Referent     |         |                     |             |         |
| No                                  | 31.0                           | 1.31              | (0.99–1.73)  | 0.060   |                     |             |         |

cOR, crude odds ratio; aOR, adjusted odds ratio; STIs, sexually transmitted infections.

‡ Routine programmatic HIV screening includes screening programmes for those with STIs, hospital inpatients and those identified through contact tracing.

† Missing data were imputed.

## DISCUSSION

This study highlights the missed opportunities for early diagnosis in persons at risk of HIV infection who do not undergo regular testing. Slightly less than half of the HIV/AIDS cases reported no previous HIV test prior to diagnosis during the six-year study period. Close to two-thirds of the cases diagnosed at late-stage HIV infection did not have previous HIV tests, more than twice the proportion among those diagnosed early (29.4%). Among those who had undergone previous HIV tests prior to diagnosis, the median duration from the last negative test to HIV diagnosis was 3.8 years among cases with late-stage HIV infection, double that of those diagnosed early.

Policy makers, providers of healthcare and patients, or “the 3 P’s”, play an important role in addressing the barriers to HIV testing which lead to delayed diagnosis.<sup>10</sup> On the policy front, many initiatives to facilitate testing has been implemented in Singapore. Screening for HIV has constituted part of the routine mandatory antenatal screening package since December 2004. To encourage voluntary screening by reducing the stigma associated with seeking HIV testing, the Ministry of Health (MOH) has introduced anonymous HIV testing using oral-fluid or blood-based rapid HIV test kits at selected GP clinics and test sites run by community-based organisations since August 2007.<sup>11</sup> All acute hospitals have implemented the opt-out HIV screening programme for inpatients aged 21 years and older since October 2008.<sup>12</sup> However, the rate of inpatient HIV testing remains low.<sup>13,14</sup>

HIV infection has a long clinical latency period during which infected individuals may show no symptoms. Relying on symptom-based HIV diagnosis would lead to late diagnosis, missing the opportunity of early detection.<sup>15,16</sup> Hence, it is crucial to provide a system that can support HIV testing with minimal inconvenience, so as to encourage greater uptake of HIV screening among those who are at risk regardless of whether they are asymptomatic or symptomatic. This study demonstrated the usefulness of anonymous

1  
2 testing as an avenue to facilitate early diagnosis of HIV in Singapore. Anonymous testing  
3 offers privacy and confidentiality that encourages more people to check their HIV status.  
4  
5 Our study found that the anonymous test sites were the most popular among cases for  
6  
7 their last negative HIV test prior to diagnosis (Fig. 3). There are now ten anonymous HIV  
8  
9 test sites in Singapore, comprising nine GP clinics and a test site operated by Action for  
10  
11 AIDS (AfA), a local non-governmental HIV/AIDS community-based organization.<sup>17</sup> To  
12  
13 make voluntary HIV screening more accessible and convenient in Singapore, AfA  
14  
15 launched the first Mobile Testing & Counselling Service which provides anonymous HIV  
16  
17 and syphilis testing on wheels in December 2011.<sup>18</sup> The number of HIV tests conducted at  
18  
19 anonymous test sites increased by 25% from 13,900 in 2013 to 17,400 in 2017.<sup>19</sup> Error!  
20  
21  
22  
23  
24  
25 **Bookmark not defined.** At-risk individuals who go to anonymous test sites are more likely to have  
26  
27 HIV testing on a regular basis or at a shorter inter-test interval, as reflected by the higher  
28  
29 proportion of cases diagnosed early (79.4%) among those who were last tested negative  
30  
31 at these test sites and the shorter median duration from the last negative test to HIV  
32  
33 diagnosis compared with other test sites (1.5 vs 2.5 years).  
34  
35

36  
37 As this study identified a significant proportion (63.9%) of late-stage HIV infection  
38  
39 among HIV/AIDS cases who did not have previous HIV tests, healthcare providers should  
40  
41 have a higher index of suspicion for HIV infection among at-risk groups, and recommend a  
42  
43 HIV test where appropriate<sup>10</sup>. In a study on HIV testing behaviour among HIV-uninfected,  
44  
45 at-risk adolescents and those who were HIV-infected in the United States, 67% of the  
46  
47 high-risk group and 53% of the HIV-infected group cited recommendation by healthcare  
48  
49 professionals as a reason to undergo HIV testing.<sup>20</sup> There is a need for physicians to be  
50  
51 cognizant of their prejudices or prejudgments as these would influence their approach  
52  
53 towards patients and recommendation of HIV testing.<sup>21</sup>  
54  
55  
56

57  
58 Individuals, especially those at high risk of STIs and HIV, would benefit from having  
59  
60 better knowledge about HIV and the symptoms related to acute or advanced HIV infection,

1  
2  
3 as well as the benefits of early diagnosis and linkage to care.<sup>10</sup> In our study, about three-  
4  
5 quarters of cases who had no previous HIV testing deemed that it was “not necessary to  
6  
7 test”, and the proportion was significantly higher among those with late-stage than early-  
8  
9 stage HIV infection at diagnosis (76.3% vs. 69.1%) (Fig. 4), which likely represents a lack  
10  
11 of knowledge of their own risk of HIV infection despite ongoing risk behaviour.  
12  
13

14 Four common risk factors were associated with no previous HIV testing in  
15  
16 multivariable analyses in both early and late stages of HIV infection at diagnosis: older  
17  
18 age, lower educational level, detection in the course of medical care and heterosexual  
19  
20 transmission (Tables 2 and 3). Older persons may perceive themselves to be at lower risk  
21  
22 of HIV infection, or may be less aware of HIV and more reluctant to undergo HIV testing.  
23  
24 Lower educational level was an impediment in having HIV tests among men having sex  
25  
26 with men (MSM) in some studies.<sup>22-25</sup> HIV testing is most likely to be initiated only during  
27  
28 medical care due to clinical suspicion of HIV infection based on disease presentations or  
29  
30 risk profiles. **Error! Bookmark not defined.** In a local study on men diagnosed in 1985–2007 who  
31  
32 were infected with HIV via sexual transmission, the cumulative proportion detected during  
33  
34 medical care surviving until the eighth year since diagnosis was 51.8%, compared to  
35  
36 69.1% among those diagnosed as a result of voluntary screening.<sup>26</sup>  
37  
38  
39  
40  
41

42 Our study revealed that HIV cases infected via heterosexual transmission were less  
43  
44 likely to have had previous testing prior to diagnosis. Similarly, in the United States,  
45  
46 heterosexuals at high risk are known to have lower testing frequency than other groups  
47  
48 such as MSM.<sup>27</sup> According to a systematic review of 19 studies that evaluated behavioural  
49  
50 preventive interventions in low- and middle-income countries, heterosexual men remained  
51  
52 under-represented in HIV prevention efforts.<sup>28</sup> This finding indicated the need to increase  
53  
54 HIV testing rates among high-risk heterosexual men.  
55  
56  
57

58 In a separate analysis for early-stage HIV infection, women were less likely to have  
59  
60 previous HIV testing prior to their diagnosis. HIV/AIDS cases diagnosed in Singapore are

1  
2  
3 predominantly men with male to female ratio of 9:1. Women who believe that their sexual  
4  
5 partners are faithful in the relationship are less likely to perceive themselves to be at risk of  
6  
7 HIV infection. Among women diagnosed early, those of Malay ethnicity were more likely  
8  
9 not to have had previous testing for HIV prior to diagnosis when compared with ethnic  
10  
11 Chinese. This could be due to HIV-related stigma arising from the influence of culture and  
12  
13 religiosity. In Malaysia, a study conducted in 2012-2013 found high HIV-related stigma,  
14  
15 which was significantly correlated with disclosure of HIV status among Malay Muslim HIV  
16  
17 patients.<sup>29</sup> Besides diagnosis of HIV in the course of medical care, women at early-stage  
18  
19 of HIV infection detected via routine programmatic HIV screening were also more likely to  
20  
21 have had no previous testing prior to diagnosis.  
22  
23

24  
25 There are several limitations in this study. The cross-sectional design of our study  
26  
27 did not allow us to make inference about the causality of having had no previous HIV  
28  
29 testing and the associated factors. Our study used the epidemiological data collected in  
30  
31 the National HIV Registry which was not designed to investigate determinants of previous  
32  
33 HIV testing. Hence, not all potential confounding factors could be included in our study,  
34  
35 and information on drivers and barriers of HIV testing was unavailable. Qualitative studies  
36  
37 are needed to delineate the processes underlying different patterns of testing in local  
38  
39 context<sup>30</sup>. As testing-related variables were ascertained based on self-reporting by  
40  
41 HIV/AIDS cases, some extent of misclassification due to recall bias could not be avoided.  
42  
43  
44  
45

46  
47 In conclusion, the proportion of cases who had never been tested for HIV prior to  
48  
49 HIV diagnosis was 45.1%, which reflects the missed opportunities for early diagnosis and  
50  
51 treatment. Our study findings highlight the need for concerted efforts to raise awareness of  
52  
53 the importance of early and regular HIV testing and boost its uptake by making HIV testing  
54  
55 more accessible and less discriminatory, particularly among the high-risk groups in  
56  
57 Singapore.  
58  
59  
60

## Acknowledgments

We thank the staff at the Singapore National HIV Registry for extraction of the HIV epidemiological database, and providing the de-identified data for this study.

## Contributors

LWA conceived the study, did statistical analysis and wrote the first draft of the manuscript. All authors (LWA, MPHST, ICB, CSW, SA, VJML, AC, YSL) contributed to data interpretation, revised the manuscript and approved the submission.

## Funding

This research received no specific grant from any funding agency in the public, commercial or not-for-profit sectors.

## Competing interests

None declared.

## Patient consent for publication

Not applicable.

## Provenance and peer review

Not commissioned; externally peer reviewed.

## Data availability statement

All data relevant to the study are included in the article.

## REFERENCES

1. UNAIDS. 90–90–90—An ambitious treatment target to help end the AIDS epidemic. Available at <http://www.unaids.org/en/resources/documents/2017/90-90-90>. (accessed 27 July 2018).
2. Lee VJM. Where are we with 90-90-90 in Singapore? Webinar 2: Update on HIV Treatment and Cure. Panel presentation at the 12th Singapore AIDS Conference, 5 December 2020. Available at <https://afa.org.sg/whatwedo/advocate/sac-12th-2020> (accessed 18 December 2020).
3. Ministry of Health, Singapore. Update on the HIV/AIDS situation in Singapore 2019 (June 2020). Available at <https://www.moh.gov.sg/resources-statistics/infectious-disease-statistics/hiv-stats/update-on-the-hiv-aids-situation-in-singapore-2019-june-2020> (accessed 6 December 2020).
4. Cutter, JL, Lim WY, Ang LW, Tun Y, James L, Chew SK. HIV in Singapore – Past, present, and future. *AIDS Educ Prev.* 2004;16:3 Suppl. A:110-8.
5. Tey JS, Ang LW, Tay J, Cutter JL, James L, Chew SK, Goh KT. Determinants of late-stage HIV disease at diagnosis in Singapore, 1996 to 2009. *Ann Acad Med Singapore.* 2012;41(5):194-9.
6. Chadborn TR, Delpech VC, Sabin CA, Sinka K, Evans BG. The late diagnosis and consequent short-term mortality of HIV-infected heterosexuals (England and Wales, 2000-2004). *AIDS* 2006;20(18):2371-9.
7. Ang LW, Tey SH and James L. Determinants of late-stage human immunodeficiency virus infection at first diagnosis. *Singapore Epidemiol News Bull.* 2008;34(3):47-50.
8. Ministry of Health, Singapore. Infectious Diseases Act. Available at <https://www.moh.gov.sg/policies-and-legislation/infectious-diseases-act> (accessed 31 August 2020).
9. Stekhoven DJ, Buhlmann P. MissForest - non-parametric missing value imputation for mixed-type data. *Bioinformatics.* 2012;28(1): 112-8. doi: 10.1093/bioinformatics/btr597.
10. Darling KE, Hachfeld A, Cavassini M, Kirk O, Furrer H, Wandeler G. Late presentation to HIV care despite good access to health services: current epidemiological trends and how to do better. *Swiss Med Wkly.* 2016;146:w14348.

- 1  
2  
3 11. HealthHub, Singapore. Get tested for HIV in minutes. Last reviewed on 14  
4  
5 November 2018. Available at [https://www.healthhub.sg/live-](https://www.healthhub.sg/live-healthy/371/get_tested_HIV_in_minutes)  
6  
7 [healthy/371/get\\_tested\\_HIV\\_in\\_minutes](https://www.healthhub.sg/live-healthy/371/get_tested_HIV_in_minutes) (accessed 4 May 2019).
- 8 12. Ang LW, Tay J. Fighting a rising tide – update of the HIV/AIDS situation in Singapore  
9  
10 2008. Singapore Epidemiol News Bull. 2009;35(2):23-9.
- 11 13. Chua AC, Leo YS, Cavailler O, Chu C, Ng A, Ng OT, Krishnan P. Opt-out of  
12  
13 voluntary HIV testing: A Singapore hospital's experience. PLoS One. 2012;7(4):  
14  
15 e34663..
- 16 14. Tan XQ, Goh WP, Venkatachalam I, Goh D, Sridhar R, Chan HC, Archuleta S.  
17  
18 Evaluation of a HIV voluntary opt-out screening program in a Singapore hospital.  
19  
20 PLoS One. 2015; 10(1): e0116987.
- 21 15. Rützel K, Lemsalu L, Lätt S, Epstein J, On Behalf Of OptTEST By HiE. Missed  
22  
23 opportunities for HIV testing in people diagnosed with HIV, Estonia, 2014 to 2015.  
24  
25 Euro Surveill. 2019;24(15).
- 26 16. Inghels M, Niangoran S, Minga A, Yoboue JM, Dohoun L, Yao A, et al. Missed  
27  
28 opportunities for HIV testing among newly diagnosed HIV-infected adults in Abidjan,  
29  
30 Côte d'Ivoire. PLoS One. 2017;12(10):e0185117.
- 31 17. Zhang Y, Kurupatham L, Badaruddin H, Huang F, Low C, Cui L, et al. Evaluation of  
32  
33 the HIV surveillance system in Singapore. Singapore Epidemiol News Bull.  
34  
35 2016;42(2):16-21.
- 36 18. Action for AIDS, Singapore. Annual Report 2011. Available at  
37  
38 [http://www.afa.org.sg/wordpress/wpcontent/uploads/reports/2011\\_report\\_and\\_state](http://www.afa.org.sg/wordpress/wpcontent/uploads/reports/2011_report_and_state)  
39  
40 [ment.pdf](http://www.afa.org.sg/wordpress/wpcontent/uploads/reports/2011_report_and_state) (accessed 15 February 2019).
- 41 19. Ministry of Health, Singapore. Communicable Diseases Surveillance in Singapore  
42  
43 2017. Communicable Diseases Division, Ministry of Health, Singapore, 2018.
- 44 20. Murphy DA, Mitchell R, Vermund SH, Futterman D; Adolescent Medicine HIV/AIDS  
45  
46 Research Network. Factors associated with HIV testing among HIV-positive and HIV-  
47  
48 negative high-risk adolescents: the REACH Study. Reaching for Excellence in  
49  
50 Adolescent Care and Health. Pediatrics. 2002;110(3):e36.
- 51 21. Chua AC. HIV: Time for the medical community to move forward. Ann Acad Med  
52  
53 Singapore. 2009; 38(2):97-8.
- 54 22. Li R, Pan X, Ma Q, Wang H, He L, Jiang T, Wang D, Zhang Y, Zhang X, Xia S.  
55  
56 Prevalence of prior HIV testing and associated factors among MSM in Zhejiang  
57  
58 Province, China: a cross-sectional study. BMC Public Health. 2016;16(1):1152.  
59  
60



- 1  
2  
3 23. Mitchell JW, Horvath KJ. Factors associated with regular HIV testing among a  
4 sample of US MSM with HIV-negative main partners. *J Acquir Immune Defic Syndr*.  
5 2013;64(4):417-23.  
6  
7  
8 24. Brito AM, Kendall C, Kerr L, Mota RM, Guimarães MD, Dourado I, Pinho AA,  
9 Benzaken AS, Brignol S, Reingold AL. Factors associated with low levels of HIV  
10 testing among men who have sex with men (MSM) in Brazil. *PLoS One*.  
11 2015;10(6):e0130445.  
12  
13  
14 25. Chantal den Daas, Martine Doppen, Axel J Schmidt, Eline Op de Coul.  
15 Determinants of never having tested for HIV among MSM in the Netherlands. *BMJ*  
16 *Open*. 2016;6(1):e009480.  
17  
18  
19 26. Ang LW, Tey SH, James L. HIV-positive cases detected during medical care versus  
20 voluntary HIV screening in Singapore – how are they different? *Singapore*  
21 *Epidemiol News Bull*. 2009;35(3):52-6.  
22  
23  
24 27. Jenness SM, Murrill CS, Liu KL, Wendel T, Begier E, Hagan H. Missed  
25 opportunities for HIV testing among high-risk heterosexuals. *Sex Transm Dis*.  
26 2009;36(11):704-10.  
27  
28  
29 28. Townsend L, Mathews C, Zembe Y. A systematic review of behavioral interventions  
30 to prevent HIV infection and transmission among heterosexual, adult men in low-  
31 and middle-income countries. *Prev Sci*. 2013;14(1):88-105.  
32  
33  
34 29. Fadzil NA, Othman Z, Mustafa M. Stigma in Malay patients with HIV/AIDS in  
35 Malaysia. *Int Medical J*. 2016;23(4):1-4.  
36  
37  
38 30. Tan RKJ, Kaur N, Chen MI, Wong CS. Developing a typology of HIV/STI testing  
39 patterns among gay, bisexual, and queer men: a framework to guide interventions.  
40 *Qual Health Res*. 2020;30(4):610-621. doi: 10.1177/1049732319870174.  
41  
42  
43  
44  
45  
46  
47  
48  
49  
50  
51  
52  
53  
54  
55  
56  
57  
58  
59  
60

## Figure captions

Figure 1. Percentage of sexually transmitted HIV/AIDS cases who did not have HIV tests prior to diagnosis by stage of HIV infection at diagnosis in Singapore, 2012–2017

Figure 2. Histogram of time interval (in years) from last negative test to diagnosis among sexually transmitted HIV/AIDS cases who had previous HIV tests prior to diagnosis by stage of HIV infection at diagnosis in Singapore, 2012–2017

Figure 3. Distribution (%) of test sites of sexually transmitted HIV/AIDS cases for their last negative HIV test result prior to diagnosis by stage of HIV infection at diagnosis in Singapore, 2012–2017

\* Other test sites include Communicable Disease Centre, blood bank and Singapore Anti-Tuberculosis Association.

Figure 4. Distribution (%) of reasons for no previous HIV test prior to diagnosis among sexually transmitted HIV cases by stage of HIV infection at diagnosis in Singapore, 2012–2017

\* Other reasons include concern about confidentiality of test result and fear of needles.

1  
2  
3  
4  
5  
6  
7  
8  
9  
10  
11  
12  
13  
14  
15  
16  
17  
18  
19  
20  
21  
22  
23  
24  
25  
26  
27  
28  
29  
30  
31  
32  
33  
34  
35  
36  
37  
38  
39  
40  
41  
42  
43  
44  
45  
46  
47  
48  
49  
50  
51  
52  
53  
54  
55  
56  
57  
58  
59  
60

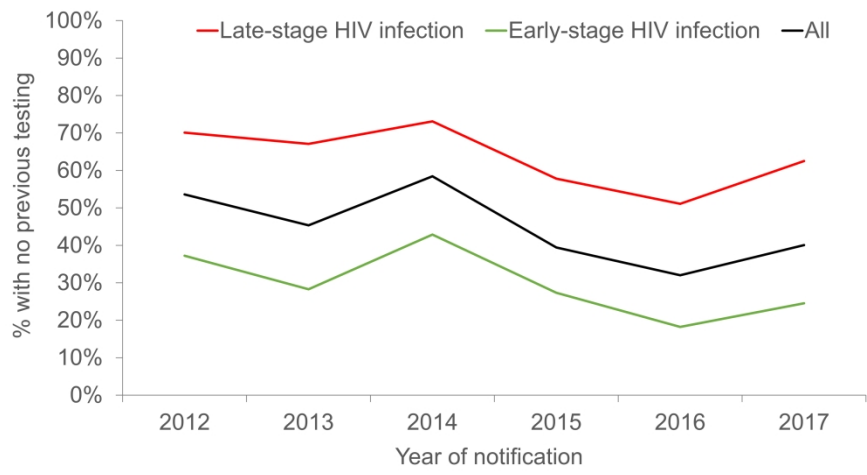

Figure 1. Percentage of sexually transmitted HIV/AIDS cases who did not have HIV tests prior to diagnosis by stage of HIV infection at diagnosis in Singapore, 2012-2017.

338x190mm (300 x 300 DPI)

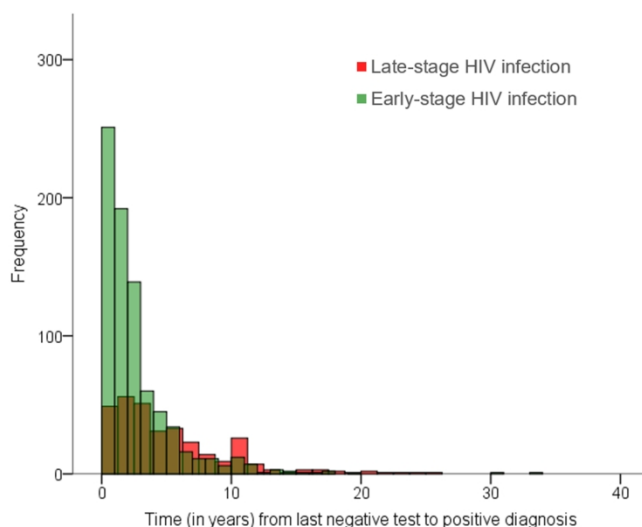

Figure 2. Histogram of time interval (in years) from last negative test to diagnosis among sexually transmitted HIV/AIDS cases who had previous HIV tests prior to diagnosis by stage of HIV infection at diagnosis in Singapore, 2012–2017.

338x190mm (300 x 300 DPI)

1  
2  
3  
4  
5  
6  
7  
8  
9  
10  
11  
12  
13  
14  
15  
16  
17  
18  
19  
20  
21  
22  
23  
24  
25  
26  
27  
28  
29  
30  
31  
32  
33  
34  
35  
36  
37  
38  
39  
40  
41  
42  
43  
44  
45  
46  
47  
48  
49  
50  
51  
52  
53  
54  
55  
56  
57  
58  
59  
60

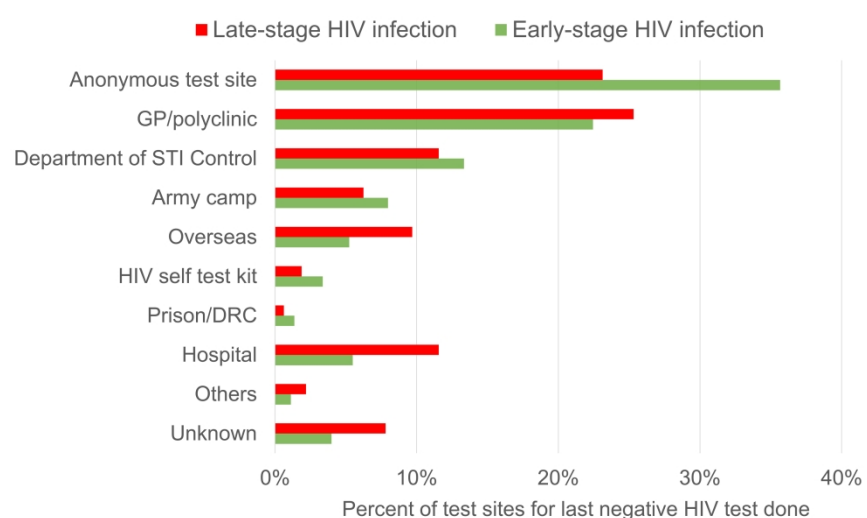

Figure 3. Distribution (%) of test sites of sexually transmitted HIV/AIDS cases for their last negative HIV test result prior to diagnosis by stage of HIV infection at diagnosis in Singapore, 2012–2017.

338x190mm (300 x 300 DPI)

1  
2  
3  
4  
5  
6  
7  
8  
9  
10  
11  
12  
13  
14  
15  
16  
17  
18  
19  
20  
21  
22  
23  
24  
25  
26  
27  
28  
29  
30  
31  
32  
33  
34  
35  
36  
37  
38  
39  
40  
41  
42  
43  
44  
45  
46  
47  
48  
49  
50  
51  
52  
53  
54  
55  
56  
57  
58  
59  
60

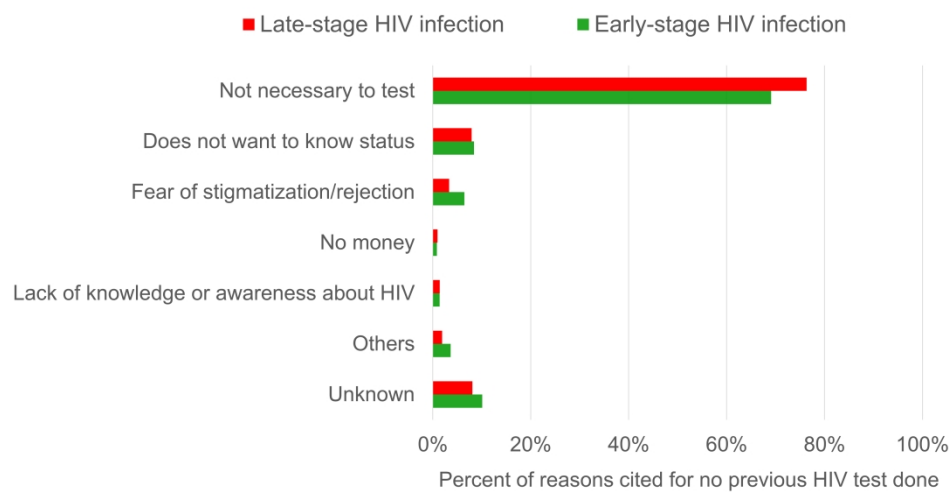

Figure 4. Distribution (%) of reasons for no previous HIV test prior to diagnosis among sexually transmitted HIV cases by stage of HIV infection at diagnosis in Singapore, 2012–2017.

338x190mm (300 x 300 DPI)

## Missed opportunities for early HIV diagnosis: Epidemiological factors associated with the absence of previous HIV testing among HIV-infected persons in Singapore, 2012 to 2017

### STROBE 2007 (v4) Statement—Checklist of items that should be included in reports of *cross-sectional studies*

| Section/Topic            | Item # | Recommendation                                                                                                                                                                       | Reported on page # |
|--------------------------|--------|--------------------------------------------------------------------------------------------------------------------------------------------------------------------------------------|--------------------|
| Title and abstract       | 1      | (a) Indicate the study's design with a commonly used term in the title or the abstract                                                                                               | 2                  |
|                          |        | (b) Provide in the abstract an informative and balanced summary of what was done and what was found                                                                                  | 2-3                |
| <b>Introduction</b>      |        |                                                                                                                                                                                      |                    |
| Background/rationale     | 2      | Explain the scientific background and rationale for the investigation being reported                                                                                                 | 5                  |
| Objectives               | 3      | State specific objectives, including any prespecified hypotheses                                                                                                                     | 5-6                |
| <b>Methods</b>           |        |                                                                                                                                                                                      |                    |
| Study design             | 4      | Present key elements of study design early in the paper                                                                                                                              | 6                  |
| Setting                  | 5      | Describe the setting, locations, and relevant dates, including periods of recruitment, exposure, follow-up, and data collection                                                      | 6                  |
| Participants             | 6      | (a) Give the eligibility criteria, and the sources and methods of selection of participants                                                                                          | 6                  |
| Variables                | 7      | Clearly define all outcomes, exposures, predictors, potential confounders, and effect modifiers. Give diagnostic criteria, if applicable                                             | 6                  |
| Data sources/measurement | 8*     | For each variable of interest, give sources of data and details of methods of assessment (measurement). Describe comparability of assessment methods if there is more than one group | 6                  |
| Bias                     | 9      | Describe any efforts to address potential sources of bias                                                                                                                            | -                  |
| Study size               | 10     | Explain how the study size was arrived at                                                                                                                                            | 6                  |
| Quantitative variables   | 11     | Explain how quantitative variables were handled in the analyses. If applicable, describe which groupings were chosen and why                                                         | 7                  |
| Statistical methods      | 12     | (a) Describe all statistical methods, including those used to control for confounding                                                                                                | 7                  |
|                          |        | (b) Describe any methods used to examine subgroups and interactions                                                                                                                  | 7                  |

|                          |     |                                                                                                                                                                                                              |         |
|--------------------------|-----|--------------------------------------------------------------------------------------------------------------------------------------------------------------------------------------------------------------|---------|
|                          |     | (c) Explain how missing data were addressed                                                                                                                                                                  | 7       |
|                          |     | (d) If applicable, describe analytical methods taking account of sampling strategy                                                                                                                           | -       |
|                          |     | (e) Describe any sensitivity analyses                                                                                                                                                                        | -       |
| <b>Results</b>           |     |                                                                                                                                                                                                              |         |
| Participants             | 13* | (a) Report numbers of individuals at each stage of study—eg numbers potentially eligible, examined for eligibility, confirmed eligible, included in the study, completing follow-up, and analysed            | 7-8     |
|                          |     | (b) Give reasons for non-participation at each stage                                                                                                                                                         | -       |
|                          |     | (c) Consider use of a flow diagram                                                                                                                                                                           | -       |
| Descriptive data         | 14* | (a) Give characteristics of study participants (eg demographic, clinical, social) and information on exposures and potential confounders                                                                     | 8       |
|                          |     | (b) Indicate number of participants with missing data for each variable of interest                                                                                                                          | 9-10    |
| Outcome data             | 15* | Report numbers of outcome events or summary measures                                                                                                                                                         | 9-11    |
| Main results             | 16  | (a) Give unadjusted estimates and, if applicable, confounder-adjusted estimates and their precision (eg, 95% confidence interval). Make clear which confounders were adjusted for and why they were included | 11-14   |
|                          |     | (b) Report category boundaries when continuous variables were categorized                                                                                                                                    | 9,12-13 |
|                          |     | (c) If relevant, consider translating estimates of relative risk into absolute risk for a meaningful time period                                                                                             | -       |
| Other analyses           | 17  | Report other analyses done—eg analyses of subgroups and interactions, and sensitivity analyses                                                                                                               | -       |
| <b>Discussion</b>        |     |                                                                                                                                                                                                              |         |
| Key results              | 18  | Summarise key results with reference to study objectives                                                                                                                                                     | 15      |
| Limitations              | 19  | Discuss limitations of the study, taking into account sources of potential bias or imprecision. Discuss both direction and magnitude of any potential bias                                                   | 18      |
| Interpretation           | 20  | Give a cautious overall interpretation of results considering objectives, limitations, multiplicity of analyses, results from similar studies, and other relevant evidence                                   | 15      |
| Generalisability         | 21  | Discuss the generalisability (external validity) of the study results                                                                                                                                        | 15-18   |
| <b>Other information</b> |     |                                                                                                                                                                                                              |         |
| Funding                  | 22  | Give the source of funding and the role of the funders for the present study and, if applicable, for the original study on which the present article is based                                                | -       |

\*Give information separately for cases and controls in case-control studies and, if applicable, for exposed and unexposed groups in cohort and cross-sectional studies.



1  
2  
3  
4  
5  
6  
7  
8  
9  
10  
11  
12  
13  
14  
15  
16  
17  
18  
19  
20  
21  
22  
23  
24  
25  
26  
27  
28  
29  
30  
31  
32  
33  
34  
35  
36  
37  
38  
39  
40  
41  
42  
43  
44  
45  
46

**Note:** An Explanation and Elaboration article discusses each checklist item and gives methodological background and published examples of transparent reporting. The STROBE checklist is best used in conjunction with this article (freely available on the Web sites of PLoS Medicine at <http://www.plosmedicine.org/>, Annals of Internal Medicine at <http://www.annals.org/>, and Epidemiology at <http://www.epidem.com/>). Information on the STROBE Initiative is available at [www.strobe-statement.org](http://www.strobe-statement.org).

For peer review only

# BMJ Open

## Epidemiological factors associated with the absence of previous HIV testing among HIV-positive persons in Singapore, 2012 to 2017

|                                 |                                                                                                                                                                                                                                                                                                                                                                                                                                                 |
|---------------------------------|-------------------------------------------------------------------------------------------------------------------------------------------------------------------------------------------------------------------------------------------------------------------------------------------------------------------------------------------------------------------------------------------------------------------------------------------------|
| Journal:                        | <i>BMJ Open</i>                                                                                                                                                                                                                                                                                                                                                                                                                                 |
| Manuscript ID                   | bmjopen-2021-050133.R1                                                                                                                                                                                                                                                                                                                                                                                                                          |
| Article Type:                   | Original research                                                                                                                                                                                                                                                                                                                                                                                                                               |
| Date Submitted by the Author:   | 10-Jul-2021                                                                                                                                                                                                                                                                                                                                                                                                                                     |
| Complete List of Authors:       | Ang, Li Wei; National Centre for Infectious Diseases, Toh, Matthias Paul Han Sim; National Centre for Infectious Diseases Boudville, Irving; National Centre for Infectious Diseases Wong, Chen Seong; National Centre for Infectious Diseases Archuleta, Sophia; National Centre for Infectious Diseases Lee, Vernon; Ministry of Health, Singapore Chow, Angela; Tan Tock Seng Hospital Leo, Yee-Sin; National Centre for Infectious Diseases |
| <b>Primary Subject Heading</b>: | Epidemiology                                                                                                                                                                                                                                                                                                                                                                                                                                    |
| Secondary Subject Heading:      | HIV/AIDS                                                                                                                                                                                                                                                                                                                                                                                                                                        |
| Keywords:                       | Epidemiology < INFECTIOUS DISEASES, HIV & AIDS < INFECTIOUS DISEASES, Public health < INFECTIOUS DISEASES, EPIDEMIOLOGY                                                                                                                                                                                                                                                                                                                         |
|                                 |                                                                                                                                                                                                                                                                                                                                                                                                                                                 |

SCHOLARONE™  
Manuscripts



I, the Submitting Author has the right to grant and does grant on behalf of all authors of the Work (as defined in the below author licence), an exclusive licence and/or a non-exclusive licence for contributions from authors who are: i) UK Crown employees; ii) where BMJ has agreed a CC-BY licence shall apply, and/or iii) in accordance with the terms applicable for US Federal Government officers or employees acting as part of their official duties; on a worldwide, perpetual, irrevocable, royalty-free basis to BMJ Publishing Group Ltd ("BMJ") its licensees and where the relevant Journal is co-owned by BMJ to the co-owners of the Journal, to publish the Work in this journal and any other BMJ products and to exploit all rights, as set out in our [licence](#).

The Submitting Author accepts and understands that any supply made under these terms is made by BMJ to the Submitting Author unless you are acting as an employee on behalf of your employer or a postgraduate student of an affiliated institution which is paying any applicable article publishing charge ("APC") for Open Access articles. Where the Submitting Author wishes to make the Work available on an Open Access basis (and intends to pay the relevant APC), the terms of reuse of such Open Access shall be governed by a Creative Commons licence – details of these licences and which [Creative Commons](#) licence will apply to this Work are set out in our licence referred to above.

Other than as permitted in any relevant BMJ Author's Self Archiving Policies, I confirm this Work has not been accepted for publication elsewhere, is not being considered for publication elsewhere and does not duplicate material already published. I confirm all authors consent to publication of this Work and authorise the granting of this licence.

## Epidemiological factors associated with the absence of previous HIV testing among HIV-positive persons in Singapore, 2012 to 2017

Li Wei Ang<sup>1\*</sup>, Matthias Paul Han Sim Toh<sup>1,2</sup>, Irving Charles Boudville<sup>1</sup>, Chen Seong Wong<sup>3,4,5</sup>, Sophia Archuleta<sup>3,5,6</sup>, Vernon Jian Ming Lee<sup>2,7</sup>, Angela Chow<sup>1,2,8,9</sup>, Yee Sin Leo<sup>2,4,5,8,10</sup>

1. National Public Health and Epidemiology Unit, National Centre for Infectious Diseases, Singapore
2. Saw Swee Hock School of Public Health, National University of Singapore, Singapore
3. National HIV Programme, National Centre for Infectious Diseases, Singapore
4. Department of Infectious Diseases, Tan Tock Seng Hospital, Singapore
5. Yong Loo Lin School of Medicine, National University of Singapore, Singapore
6. Division of Infectious Diseases, Department of Medicine, National University Hospital, National University Health System, Singapore
7. Communicable Diseases Division, Ministry of Health, Singapore
8. Lee Kong Chian School of Medicine, Nanyang Technological University, Singapore
9. Department of Clinical Epidemiology, Office of Clinical Epidemiology, Analytics, and Knowledge (OCEAN), Tan Tock Seng Hospital, Singapore
10. National Centre for Infectious Diseases, Singapore

§ Corresponding author: Li Wei Ang

National Centre for Infectious Diseases, 16 Jalan Tan Tock Seng, Singapore 308442

Tel: +65 63596950

Email: [Li\\_Wei\\_Ang@ncid.sg](mailto:Li_Wei_Ang@ncid.sg)

## ABSTRACT

**Objective:** To assess temporal trend and identify risk factors associated with the absence of previous HIV testing prior to their diagnosis among HIV-positive persons in Singapore.

**Study design:** Cross-sectional.

**Setting and participants:** We analyzed data of HIV-positive persons infected via sexual transmission, who were notified to the National HIV Registry in 2012–2017.

**Outcomes:** Epidemiological factors associated with the absence of HIV testing prior to diagnosis were determined separately for two groups of HIV-positive persons: early and late stages of HIV infection at diagnosis.

**Results:** 2,188 HIV-positive persons with information on HIV testing history and CD4 cell count were included in the study. The median age at HIV diagnosis was 40 years (interquartile range [IQR], 30–51). Nearly half (45.1%) had never been tested for HIV prior to their diagnosis. The most common reason cited for no previous HIV testing was “not necessary to test” (73.7%). The proportion diagnosed at late-stage HIV infection was significantly higher among HIV-positive persons who had never been tested for HIV (63.9%) compared with those who had undergone previous HIV tests (29.0%). Common risk factors associated with no previous HIV testing in multivariable logistic regression analysis stratified by stage of HIV infection were: older age at HIV diagnosis, lower educational level, detection via medical care, and HIV infection via heterosexual transmission. In the stratified analysis for persons diagnosed at early-stage of HIV infection, in addition to the four risk factors, women and those of Malay ethnicity were also less likely to have previous HIV testing prior to their diagnosis.

**Conclusion:** Targeted prevention efforts and strategies are needed to raise the level of awareness of HIV/AIDS and to encourage early and regular screening among the at-risk groups by making HIV testing more accessible.

1  
2  
3  
4  
5  
6 (Word count: 279)  
7  
8

9 **Keywords:** late-stage, HIV testing; risk factors, screening  
10  
11  
12  
13  
14  
15  
16  
17  
18  
19  
20  
21  
22  
23  
24  
25  
26  
27  
28  
29  
30  
31  
32  
33  
34  
35  
36  
37  
38  
39  
40  
41  
42  
43  
44  
45  
46  
47  
48  
49  
50  
51  
52  
53  
54  
55  
56  
57  
58  
59  
60

For peer review only

## ARTICLE SUMMARY

### Strengths and limitations of this study

- We were able to use the epidemiological data collected in the National HIV Registry in Singapore, which improves the generalisability of the findings.
- Not all potential confounding factors associated with absence of prior HIV testing prior to HIV diagnosis could be included in our study, and information on drivers and barriers of HIV testing was unavailable.
- As testing-related variables were ascertained based on self-reporting by HIV/AIDS cases, some extent of misclassification due to recall bias could not be avoided.

Peer review only

## INTRODUCTION

Regular HIV testing among at-risk individuals is paramount as a preventive strategy in the programmatic response to HIV/AIDS epidemic. The Joint United Nations Programme on HIV/AIDS (UNAIDS) and partners launched the 90–90–90 targets in 2014, which called for 90% of all people living with HIV (PLHIV) to be aware of their status, 90% of those diagnosed to receive antiretroviral therapy (ART), and 90% of those on ART to achieve viral suppression by 2020.<sup>1</sup> The corresponding estimates for PLHIV in Singapore were 80%, 91% and 91% in 2018.<sup>2</sup> Regular and frequent HIV testing provides an essential gateway to serostatus awareness and early diagnosis, thereby enhancing the effectiveness of all subsequent steps in the cascade of HIV care including provision of ART and counselling on behaviour. The risk of onward transmission by persons who are unaware of their HIV infection and premature deaths is also reduced with diagnosis of HIV infection at an early stage.

As of end-2019, there were 8,618 Singapore residents diagnosed with HIV infection, of whom 2,097 had died.<sup>3</sup> Despite the widespread availability and accessibility of HIV testing in Singapore, late diagnosis in the course of HIV infection continues to be a barrier in tackling HIV.<sup>4</sup> A local study revealed that over half (54%) of HIV-positive persons infected via sexual transmission in 1996–2009 had late-stage disease at diagnosis.<sup>5</sup> The higher short-term mortality of persons diagnosed with late-stage HIV infection underscores the importance of testing and detection at the earliest opportunity.<sup>6</sup> Another local study found that the median survival of HIV-positive persons diagnosed late was 5 years, whereas the cumulative proportion of those diagnosed early surviving until the fifth year since diagnosis was 80%.<sup>7</sup>

This study seeks to elucidate epidemiological factors associated with the absence of previous HIV testing prior to their diagnosis separately for HIV-positive persons diagnosed at early and late stages of HIV infection. The findings provide insights into reviewing and tailoring public health preventive and interventional



1 strategies to increase the uptake of HIV testing in at-risk groups, so as to facilitate  
2 early diagnosis and timely initiation of ART for HIV-infected persons.  
3  
4  
5  
6  
7

## 8 **MATERIALS AND METHODS**

### 9 **Study population**

10  
11  
12  
13 Notification of HIV/AIDS diagnosis is mandatory under the Infectious Diseases  
14 Act in Singapore<sup>8</sup>. Information collected in the National HIV Registry is protected  
15 under the law, and includes socio-demographic characteristics, CD4 cell count, mode  
16 of detection and exposure factors such as the mode of transmission and the type of  
17 sexual partners.  
18  
19  
20  
21  
22  
23

24  
25 Information on risk factors and current and previous HIV testing behaviour is  
26 obtained from review of medical case notes and interviews with persons who are  
27 diagnosed with HIV. The mode of HIV transmission consists of sexual contact  
28 (heterosexual, homosexual, or bisexual), intravenous drug use, blood transfusion,  
29 renal transplant overseas, perinatal (mother to child), and uncertain/others. The  
30 mode of detection consists of voluntary screening (own request), medical care for  
31 HIV related symptoms and non-HIV care, routine programmatic HIV screening  
32 (includes screening programmes for those with sexually transmitted infections [STIs],  
33 hospital inpatients and those identified through contact tracing), and other reasons for  
34 current HIV testing such as health screening for life insurance application. We  
35 classified the type of sexual partners into mutually exclusive categories (regular only;  
36 regular and casual only; sex workers and social escorts) based on the following  
37 groups: casual; regular; spouse / girlfriend / boyfriend; sex worker (brothel-based),  
38 sex worker (non-brothel) / social escort; ex-spouse / ex-girlfriend / ex-boyfriend.  
39  
40  
41  
42  
43  
44  
45  
46  
47  
48  
49  
50  
51  
52  
53  
54  
55

56  
57 Data on self-reported history of HIV testing has been collected since 2010,  
58 and the proportion of missing data dropped from 39% in 2010 to below 20% since  
59 2012. The majority (95.1%) of HIV-positive persons reported in 1985–2017 were  
60

1  
2 infected via sexual transmission, hence we restricted the analyses to those infected  
3  
4 via sexual transmission to allow for a more homogenous group. The study population  
5  
6 were sexually transmitted HIV-positive persons diagnosed and notified to the  
7  
8 National HIV Registry in 2012–2017. Approval for this study was provided by the  
9  
10 Ministry of Health, Singapore. As the data was collected under the Infectious  
11  
12 Diseases Act and analyses were performed on an anonymized dataset, informed  
13  
14 consent was not required for this study.  
15  
16

17  
18 The analyses were stratified by stage of HIV infection at diagnosis (early or  
19  
20 late), hence HIV-positive persons with either unknown HIV testing history or missing  
21  
22 CD4 count at diagnosis were excluded. Factors associated with no previous HIV  
23  
24 testing were deemed to differ depending on the stage of infection at diagnosis, hence  
25  
26 separate analysis was conducted for HIV-positive persons diagnosed at early and  
27  
28 late stages of infection. Late-stage HIV infection was defined as having either a CD4  
29  
30 count  $<200$  cells/mm<sup>3</sup> at the time of diagnosis, or an AIDS-defining illness at  
31  
32 diagnosis or within one year of HIV diagnosis.<sup>5</sup> To ensure accuracy in classifying late-  
33  
34 stage HIV infection based on CD4 count  $<200$  cells/mm<sup>3</sup>, efforts were taken to  
35  
36 exclude acute infection through the process of contact tracing interviews, which  
37  
38 include questions about previous HIV tests. Recency assays to document or confirm  
39  
40 acute infections were not done routinely or universally for all persons newly-  
41  
42 diagnosed with HIV. We excluded HIV-positive persons whose first available date of  
43  
44 CD4 count was more than 90 days after their HIV diagnosis date as they would most  
45  
46 likely to have started treatment on their first date of CD4 count, hence whether these  
47  
48 individuals had late-stage infection or not was unknown.  
49  
50  
51  
52  
53  
54  
55  
56

### 57 **Patient and public involvement**

58  
59 Patients and/or the public were not involved in the design, or conduct, or reporting, or  
60  
dissemination plans of the study results.

## Statistical analysis

Changes in proportions over time were analysed using the Chi-square test for trend. The Chi-square test or Fisher's exact test, where appropriate, was used for comparison of categorical variables. The Mann-Whitney U test was used to assess differences between any two groups for continuous variables. For variables with missing data proportion less than 10%, we used missForest (version 1.4), an iterative non-parametric method, to impute the missing values.<sup>9</sup>

The main outcome was whether the HIV-positive person had previous HIV tests prior to diagnosis. Crude odds ratios (OR) and adjusted odds ratio (aOR) along with 95% confidence interval (CI) were calculated based on logistic regression models. Multivariable analysis was conducted to determine factors independently associated with no previous HIV testing. Variables with  $p < 0.10$  in the univariable regression analyses were considered for inclusion in a backward selection process, and retained in the final multivariable model only when  $p < 0.05$ . We performed separate logistic regression analyses for two groups: early and late stages of HIV infection at diagnosis.

All  $p$  values reported were 2-sided and statistical significance was taken as  $p < 0.05$ . Statistical analyses were performed using SPSS version 24 (IBM, USA) and R version 3.5.0 (R Foundation for Statistical Computing, Vienna, Austria).

## RESULTS

A total of 2,579 newly-diagnosed HIV-positive persons infected via sexual transmission were notified to the National HIV Registry in 2012–2017. We excluded 391 cases from this study; 282 had unknown HIV testing history and another 109 did not have CD4 cell counts measured at diagnosis. Among the 2,188 HIV-positive persons included in the study, 45.1% had no previous HIV testing prior to diagnosis.

1  
2 There was a significant decline in the annual proportion of HIV-positive persons with  
3 no previous HIV testing; from 53.6% in 2012 to 40.1% in 2017 ( $p < 0.0005$ ) (Fig. 1).

4  
5  
6 The annual proportion without previous HIV testing was consistently higher in  
7  
8 persons diagnosed at late-stage than early-stage of HIV infection.  
9

10  
11 The median age of the 2,188 HIV-positive persons was 40 years (interquartile  
12 range [IQR], 30–51). About 93.5% were men, 71.8% were Chinese, 68.8% had never  
13 been married, 67.0% had attained post-secondary education or diploma levels  
14 (67.0%), and 62.5% worked in professional/managerial positions or  
15 administrative/service sectors (Table 1). About 45.7% of the HIV-positive persons  
16 were detected during the course of medical care wherein HIV testing was performed  
17 as part of the diagnostic evaluation for their presenting symptoms, while 28.1% were  
18 detected via routine programmatic HIV screening. Over half of the HIV-positive  
19 persons were infected via homosexual/bisexual route of transmission (58.8%), had  
20 regular and casual sexual partners only (62.0%), were diagnosed at early-stage of  
21 HIV infection (55.3%), and did not have any self-reported history of STIs (76.2%).  
22  
23  
24  
25  
26  
27  
28  
29  
30  
31  
32  
33  
34  
35  
36  
37  
38

### 39 **Characteristics of HIV-positive persons with and without previous HIV testing**

40  
41 Compared with HIV-positive persons who had previous HIV testing, a  
42 significantly higher proportion of those without previous testing were aged 45 years or  
43 older at HIV diagnosis (59.7% vs. 21.0%), women (10.6% vs. 3.2%), had ever been  
44 married (48.9% vs. 16.6%), had a secondary education or below (29.3% vs. 11.2%),  
45 and were blue-collar workers (23.0% vs. 4.8%) or unemployed (4.4% vs. 2.2%)  
46 (Table 1). A significantly higher proportion of HIV-positive persons without previous  
47 HIV tests were diagnosed in the course of medical care (65.5% vs. 29.5%), infected  
48 via heterosexual transmission (64.1% vs. 22.4%), and had sex workers and social  
49 escorts as sexual partners (39.0% vs. 15.9%). The proportion without any self-  
50 reported history of STIs was significantly higher among HIV-positive persons without  
51  
52  
53  
54  
55  
56  
57  
58  
59  
60

previous tests than in those who had ever been tested for HIV prior to diagnosis (81.0% vs. 72.3%). The proportion of late-stage HIV infection among HIV-positive persons without previous tests was about two times that of those with previous HIV tests (63.9% vs. 29.0%).

**Table 1. Characteristics (%) of sexually transmitted HIV-positive persons by history of HIV testing prior to diagnosis in Singapore, 2012–2017.**

| Characteristic                                  | Total<br>(N=2,188) | No<br>previous<br>HIV tests<br>(N=986) | Had<br>previous<br>HIV tests<br>(N=1,202) | P-value |
|-------------------------------------------------|--------------------|----------------------------------------|-------------------------------------------|---------|
|                                                 | n (%)              | n (%)                                  | n (%)                                     |         |
| Age group (years)                               |                    |                                        |                                           | <0.0005 |
| 15–24                                           | 231 (10.6)         | 59 (6.0)                               | 172 (14.3)                                |         |
| 25–34                                           | 548 (25.0)         | 138 (14.0)                             | 410 (34.1)                                |         |
| 35–44                                           | 567 (25.9)         | 200 (20.3)                             | 367 (30.5)                                |         |
| 45–54                                           | 487 (22.3)         | 303 (30.7)                             | 184 (15.3)                                |         |
| 55–64                                           | 274 (12.5)         | 211 (21.4)                             | 63 (5.2)                                  |         |
| ≥65                                             | 81 (3.7)           | 75 (7.6)                               | 6 (0.5)                                   |         |
| Gender                                          |                    |                                        |                                           | <0.0005 |
| Male                                            | 2045 (93.5)        | 881 (89.4)                             | 1164 (96.8)                               |         |
| Female                                          | 143 (6.5)          | 105 (10.6)                             | 38 (3.2)                                  |         |
| Ethnic group                                    |                    |                                        |                                           | 0.092   |
| Chinese                                         | 1571 (71.8)        | 700 (71.0)                             | 871 (72.5)                                |         |
| Malay                                           | 413 (18.9)         | 193 (19.6)                             | 220 (18.3)                                |         |
| Indian                                          | 122 (5.6)          | 64 (6.5)                               | 58 (4.8)                                  |         |
| Others                                          | 82 (3.7)           | 29 (2.9)                               | 53 (4.4)                                  |         |
| Marital status                                  |                    |                                        |                                           | <0.0005 |
| Never married                                   | 1506 (68.8)        | 504 (51.1)                             | 1002 (83.4)                               |         |
| Married                                         | 469 (21.4)         | 326 (33.1)                             | 143 (11.9)                                |         |
| Separated/Divorced/Widowed                      | 213 (9.7)          | 156 (15.8)                             | 57 (4.7)                                  |         |
| Educational level                               |                    |                                        |                                           | <0.0005 |
| No formal / Primary                             | 161 (7.4)          | 129 (13.1)                             | 32 (2.7)                                  |         |
| Secondary                                       | 263 (12.0)         | 160 (16.2)                             | 103 (8.6)                                 |         |
| Post-secondary / Diploma                        | 1466 (67.0)        | 630 (63.9)                             | 836 (69.6)                                |         |
| University degree or higher                     | 290 (13.3)         | 63 (6.4)                               | 227 (18.9)                                |         |
| Unknown                                         | 8 (0.4)            | 4 (0.4)                                | 4 (0.3)                                   |         |
| Occupational type                               |                    |                                        |                                           | <0.0005 |
| Professional / executive                        | 463 (21.2)         | 155 (15.7)                             | 308 (25.6)                                |         |
| Administrative / service                        | 904 (41.3)         | 380 (38.5)                             | 524 (43.6)                                |         |
| Blue-collar worker                              | 285 (13.0)         | 227 (23.0)                             | 58 (4.8)                                  |         |
| Unemployed                                      | 69 (3.2)           | 43 (4.4)                               | 26 (2.2)                                  |         |
| Others                                          | 302 (13.8)         | 112 (11.4)                             | 190 (15.8)                                |         |
| Unknown                                         | 165 (7.5)          | 69 (7.0)                               | 96 (8.0)                                  |         |
| Mode of detection                               |                    |                                        |                                           | <0.0005 |
| Voluntary screening                             | 452 (20.7)         | 69 (7.0)                               | 383 (31.9)                                |         |
| Medical care                                    | 1001 (45.7)        | 646 (65.5)                             | 355 (29.5)                                |         |
| Routine programmatic HIV screening <sup>†</sup> | 615 (28.1)         | 241 (24.4)                             | 374 (31.1)                                |         |
| Others                                          | 120 (5.5)          | 30 (3.0)                               | 90 (7.5)                                  |         |
| Mode of HIV transmission                        |                    |                                        |                                           | <0.0005 |

| Characteristic                 | Total<br>(N=2,188) | No<br>previous<br>HIV tests<br>(N=986) | Had<br>previous<br>HIV tests<br>(N=1,202) | P-value |
|--------------------------------|--------------------|----------------------------------------|-------------------------------------------|---------|
| Homosexual/bisexual            | 1287 (58.8)        | 354 (35.9)                             | 933 (77.6)                                |         |
| Heterosexual                   | 901 (41.2)         | 632 (64.1)                             | 269 (22.4)                                |         |
| Type of sexual partners        |                    |                                        |                                           | <0.0005 |
| Regular only                   | 246 (11.2)         | 126 (12.8)                             | 120 (10.0)                                |         |
| Regular and casual only        | 1357 (62.0)        | 471 (47.8)                             | 886 (73.7)                                |         |
| Sex workers and social escorts | 576 (26.3)         | 385 (39.0)                             | 191 (15.9)                                |         |
| Unknown                        | 9 (0.4)            | 4 (0.4)                                | 5 (0.4)                                   |         |
| Self-reported history of STIs  |                    |                                        |                                           | <0.0005 |
| No                             | 1668 (76.2)        | 799 (81.0)                             | 869 (72.3)                                |         |
| Yes                            | 520 (23.8)         | 187 (19.0)                             | 333 (27.7)                                |         |
| Stage of HIV infection         |                    |                                        |                                           | <0.0005 |
| Early                          | 1210 (55.3)        | 356 (36.1)                             | 854 (71.0)                                |         |
| Late                           | 978 (44.7)         | 630 (63.9)                             | 348 (29.0)                                |         |

STIs, sexually transmitted infections.

‡ Routine programmatic HIV screening includes screening programmes for those with STIs, hospital inpatients and those identified through contact tracing.

There was a significant decreasing trend in the age-specific proportion having prior test(s) before HIV diagnosis; this proportion declined from 74.5% in age group of 15-24 years to 23.0% in those aged 55-64 years and 7.4% in elderly persons aged 65 years or older ( $p$  for trend <0.0005).

### Comparison of HIV-positive persons included and excluded from the study

Compared with the 391 sexually transmitted HIV-positive persons excluded from the analyses, a significantly higher proportion of those included in this study were aged between 15–34 years at HIV diagnosis (35.6% vs. 26.1%), never married (68.8% vs. 61.6%), had university degree or higher (13.3% vs. 7.2%), were detected via voluntary screening (20.7% vs. 11.8%), and infected via homosexual/bisexual transmission (58.8% vs. 48.8%) (all  $p$  <0.01) (Supplementary table). The proportion with unknown occupational type and type of sexual partners was significantly different between these two groups.

### Duration from last test to HIV diagnosis, type of test sites, and reasons cited by HIV-positive persons without previous HIV test before diagnosis

1  
2 Among the 1,202 HIV-positive persons who had previous HIV tests, 1,122  
3  
4 (93.3%) reported a negative result for the last test prior to diagnosis and their median  
5  
6 duration from the last negative test to HIV diagnosis was 2.1 years (IQR 1.0–4.4).  
7  
8 This interval was significantly longer at 3.8 years (IQR 2.0–7.3) among the 320 HIV-  
9  
10 positive persons diagnosed at late-stage HIV infection compared with 1.7 years (IQR  
11  
12 0.8–3.2) among the 802 cases diagnosed early ( $p < 0.0005$ ).

13  
14  
15 Of the remaining 80 HIV-positive persons who had previous HIV tests but last  
16  
17 test prior to diagnosis was not negative, 59 reported positive result (24 tested  
18  
19 overseas, 23 tested at anonymous test sites, 4 at other places and 8 were unknown)  
20  
21 and 21 reported indeterminate results (no information on the test site). Of the 59 HIV-  
22  
23 positive persons with previous positive test result for HIV, 30 (50.8%) were detected  
24  
25 via voluntary screening, 17 (28.8%) via medical care, 8 (13.6%) via routine  
26  
27 programmatic HIV screening and 4 (6.8%) via other modes. The median duration  
28  
29 from the first positive test to HIV diagnosis was 1.1 years (IQR 0.2–5.9).  
30  
31  
32

33  
34 Popular test sites for HIV-positive persons with previous HIV tests were  
35  
36 anonymous test sites (32.1%), primary care clinics (23.3%) and the Department of  
37  
38 STI Control (DSC) Clinic, a specialist outpatient clinic for the diagnosis, treatment  
39  
40 and control of STIs (12.8%). The median duration from the last negative test to HIV  
41  
42 diagnosis was 1.5 years (IQR 0.7–2.9) at anonymous test sites, compared with 2.5  
43  
44 years (IQR 1.2–5.2) at other test sites ( $p < 0.0005$ ).

45  
46  
47 About 49.4% of the 360 HIV-positive persons who previously tested negative  
48  
49 at anonymous test sites were subsequently diagnosed with HIV via voluntary  
50  
51 outpatient screening, while the rest were diagnosed via medical care or routine  
52  
53 programmatic HIV screening. About 79.4% of these persons were diagnosed at  
54  
55 early-stage of HIV infection. The proportion last tested negative at anonymous test  
56  
57 sites was significantly higher in HIV-positive persons diagnosed at early-stage of HIV  
58  
59 infection than those diagnosed at late-stage (35.7% vs 23.1%) ( $p < 0.0005$ ) (Fig. 2).  
60

1  
2 The most common reason cited by HIV-positive who did not have any previous  
3  
4 HIV testing prior to diagnosis was “not necessary to test” (73.7%), followed by “does  
5  
6 not want to know status” (8.1%) and “fear of stigmatisation / rejection” (4.5%). There  
7  
8 was a significantly higher proportion of HIV-positive diagnosed at late-stage of HIV  
9  
10 infection (76.3%) who cited “not necessary to test” compared with those diagnosed  
11  
12 early (69.1%) ( $p=0.01$ ) (Fig. 3).  
13  
14  
15  
16  
17

### 18 **Factors associated with no previous HIV testing**

19  
20 Four factors were independently associated with no previous HIV testing  
21  
22 among HIV-positive persons diagnosed at late-stage of infection: older age at HIV  
23  
24 diagnosis ( $\geq 55$  years vs 15–24 years), lower educational level (vs university degree  
25  
26 or higher), detection via medical care (vs voluntary screening), and HIV infection via  
27  
28 heterosexual transmission (vs homosexual/bisexual transmission) (Table 2). The  
29  
30 following six factors were independently associated with no previous HIV testing  
31  
32 among HIV-positive persons diagnosed at early-stage: older age at HIV diagnosis  
33  
34 ( $\geq 45$  years vs 15–24 years), women, Malays (vs Chinese), lower educational level (vs  
35  
36 university degree or higher), detection via medical care and routine programmatic  
37  
38 HIV screening (vs voluntary screening), and HIV infection via heterosexual  
39  
40 transmission (vs homosexual/bisexual transmission) (Table 3).  
41  
42  
43  
44  
45  
46  
47  
48  
49  
50  
51  
52  
53  
54  
55  
56  
57  
58  
59  
60



**Table 2. Proportion and odds ratios of absence of previous HIV testing in sexually transmitted HIV-positive persons cases diagnosed at late-stage HIV infection in Singapore, 2012–2017.**

| Characteristic                      | % without previous HIV testing | Univariable model |              |         | Multivariable model |              |         |
|-------------------------------------|--------------------------------|-------------------|--------------|---------|---------------------|--------------|---------|
|                                     |                                | cOR               | (95% CI)     | p value | aOR                 | (95% CI)     | p value |
| Age at diagnosis (years)            |                                |                   |              | <0.0005 |                     |              | <0.0005 |
| 15–24                               | 44.4                           | 1.00              | Referent     |         | 1.00                | Referent     |         |
| 25–34                               | 38.4                           | 0.78              | (0.34–1.78)  | 0.552   | 0.76                | (0.31–1.85)  | 0.546   |
| 35–44                               | 49.6                           | 1.23              | (0.55–2.73)  | 0.610   | 0.89                | (0.38–2.11)  | 0.794   |
| 45–54                               | 73.6                           | 3.48              | (1.56–7.76)  | 0.002   | 1.97                | (0.83–4.68)  | 0.126   |
| 55–64                               | 83.6                           | 6.37              | (2.72–14.92) | <0.0005 | 2.71                | (1.07–6.85)  | 0.035   |
| >65                                 | 93.4                           | 17.81             | (5.02–63.20) | <0.0005 | 6.14                | (1.60–23.50) | 0.008   |
| Gender                              |                                |                   |              |         |                     |              |         |
| Male                                | 62.8                           | 1.00              | Referent     |         |                     |              |         |
| Female                              | 83.1                           | 2.91              | (1.58–5.37)  | 0.001   |                     |              |         |
| Ethnic group                        |                                |                   |              | 0.087   |                     |              |         |
| Chinese                             | 65.6                           | 1.00              | Referent     |         |                     |              |         |
| Malay                               | 60.3                           | 0.80              | (0.57–1.12)  | 0.194   |                     |              |         |
| Indian                              | 73.3                           | 1.44              | (0.73–2.84)  | 0.290   |                     |              |         |
| Others                              | 50.0                           | 0.52              | (0.27–1.01)  | 0.053   |                     |              |         |
| Marital status                      |                                |                   |              | <0.0005 |                     |              |         |
| Single                              | 51.7                           | 1.00              | Referent     |         |                     |              |         |
| Married                             | 82.2                           | 4.30              | (3.02–6.13)  | <0.0005 |                     |              |         |
| Divorced/ separated/ widowed        | 81.3                           | 4.05              | (2.58–6.35)  | <0.0005 |                     |              |         |
| Educational level†                  |                                |                   |              | <0.0005 |                     |              | 0.039   |
| No formal / Primary                 | 88.9                           | 14.45             | (6.87–30.39) | <0.0005 | 3.23                | (1.40–7.46)  | 0.006   |
| Secondary                           | 66.9                           | 3.65              | (2.09–6.37)  | <0.0005 | 1.51                | (0.81–2.84)  | 0.195   |
| Post-secondary / Diploma            | 63.6                           | 3.16              | (1.98–5.04)  | <0.0005 | 1.75                | (1.03–2.96)  | 0.038   |
| University degree or higher         | 35.6                           | 1.00              | Referent     |         | 1.00                | Referent     |         |
| Occupational type†                  |                                |                   |              | <0.0005 |                     |              |         |
| Professional / executive            | 49.0                           | 1.00              | Referent     |         |                     |              |         |
| Administrative / service            | 58.7                           | 1.48              | (1.05–2.07)  | 0.023   |                     |              |         |
| Blue-collar worker                  | 84.5                           | 5.66              | (3.58–8.95)  | <0.0005 |                     |              |         |
| Unemployed                          | 80.4                           | 4.27              | (2.03–8.98)  | <0.0005 |                     |              |         |
| Others                              | 68.2                           | 2.23              | (1.31–3.81)  | 0.003   |                     |              |         |
| Mode of detection                   |                                |                   |              | <0.0005 |                     |              | <0.0005 |
| Voluntary screening                 | 26.7                           | 1.00              | Referent     |         | 1.00                | Referent     |         |
| Medical care                        | 72.7                           | 7.30              | (4.40–12.10) | <0.0005 | 4.15                | (2.35–7.33)  | <0.0005 |
| Routine programmatic HIV screening‡ | 54.1                           | 3.23              | (1.82–5.71)  | <0.0005 | 1.90                | (0.99–3.65)  | 0.054   |

| Characteristic                 | % without previous HIV testing | Univariable model |             |         | Multivariable model |             |         |
|--------------------------------|--------------------------------|-------------------|-------------|---------|---------------------|-------------|---------|
|                                |                                | cOR               | (95% CI)    | p value | aOR                 | (95% CI)    | p value |
| Others                         | 36.4                           | 1.57              | (0.67–3.68) | 0.304   | 0.89                | (0.34–2.34) | 0.819   |
| Mode of sexual transmission    |                                |                   |             |         |                     |             |         |
| Homosexual/bisexual            | 43.1                           | 1.00              | Referent    |         | 1.00                | Referent    |         |
| Heterosexual                   | 81.3                           | 5.76              | (4.32–7.67) | <0.0005 | 3.46                | (2.50–4.80) | <0.0005 |
| Type of sexual partner†        |                                |                   |             | <0.0005 |                     |             |         |
| Regular only                   | 74.5                           | 1.00              | Referent    |         |                     |             |         |
| Regular and casual only        | 52.9                           | 0.39              | (0.24–0.63) | <0.0005 |                     |             |         |
| Sex workers and social escorts | 78.8                           | 1.27              | (0.75–2.14) | 0.369   |                     |             |         |
| History of STIs                |                                |                   |             |         |                     |             |         |
| Yes                            | 57.7                           | 1.00              | Referent    |         |                     |             |         |
| No                             | 65.8                           | 1.41              | (1.00–1.98) | 0.048   |                     |             |         |

cOR, crude odds ratio; aOR, adjusted odds ratio; STIs, sexually transmitted infections.

† Routine programmatic HIV screening includes screening programmes for those with STIs, hospital inpatients and those identified through contact tracing.

‡ Missing data were imputed.

**Table 3. Proportion and odds ratios of absence of previous HIV testing in sexually transmitted HIV-positive persons diagnosed at early-stage HIV infection in Singapore, 2012–2017.**

| Characteristic           | % without previous HIV testing | Univariable model |               |         | Multivariable model |              |         |
|--------------------------|--------------------------------|-------------------|---------------|---------|---------------------|--------------|---------|
|                          |                                | cOR               | (95% CI)      | p value | aOR                 | (95% CI)     | p value |
| Age at diagnosis (years) |                                |                   |               | <0.0005 |                     |              | <0.0005 |
| 15–24                    | 23.0                           | 1.00              | Referent      |         | 1.00                | Referent     |         |
| 25–34                    | 20.4                           | 0.86              | (0.57–1.29)   | 0.453   | 1.07                | (0.69–1.67)  | 0.758   |
| 35–44                    | 23.5                           | 1.02              | (0.67–1.56)   | 0.909   | 1.07                | (0.67–1.71)  | 0.769   |
| 45–54                    | 44.1                           | 2.64              | (1.71–4.08)   | <0.0005 | 2.26                | (1.38–3.73)  | 0.001   |
| 55–64                    | 62.4                           | 5.53              | (3.20–9.56)   | <0.0005 | 3.18                | (1.70–5.96)  | <0.0005 |
| ≥65                      | 90.0                           | 30.06             | (6.73–134.30) | <0.0005 | 13.17               | (2.80–62.03) | 0.001   |
| Gender                   |                                |                   |               |         |                     |              |         |
| Male                     | 27.5                           | 1.00              | Referent      |         | 1.00                | Referent     |         |
| Female                   | 62.1                           | 4.32              | (2.58–7.22)   | <0.0005 | 2.07                | (1.13–3.78)  | 0.018   |
| Ethnic group             |                                |                   |               | 0.002   |                     |              | 0.004   |
| Chinese                  | 26.7                           | 1.00              | Referent      |         | 1.00                | Referent     |         |
| Malay                    | 36.8                           | 1.60              | (1.18–2.17)   | 0.002   | 1.76                | (1.24–2.50)  | 0.002   |
| Indian                   | 40.3                           | 1.85              | (1.14–2.99)   | 0.012   | 1.21                | (0.70–2.08)  | 0.499   |
| Others                   | 22.7                           | 0.81              | (0.39–1.66)   | 0.561   | 0.53                | (0.24–1.18)  | 0.119   |
| Marital status           |                                |                   |               | <0.0005 |                     |              |         |

| Characteristic                      | % without previous HIV testing | Univariable model |              |         | Multivariable model |             |         |
|-------------------------------------|--------------------------------|-------------------|--------------|---------|---------------------|-------------|---------|
|                                     |                                | cOR               | (95% CI)     | p value | aOR                 | (95% CI)    | p value |
| Single                              | 22.5                           | 1.00              | Referent     |         |                     |             |         |
| Married                             | 52.5                           | 3.80              | (2.77–5.22)  | <0.0005 |                     |             |         |
| Divorced/ separated/ widowed        | 56.5                           | 4.47              | (2.71–7.37)  | <0.0005 |                     |             |         |
| Educational level*                  |                                |                   |              | <0.0005 |                     | <0.0005     |         |
| No formal / Primary                 | 63.0                           | 8.81              | (4.52–17.15) | <0.0005 | 2.22                | (1.04–4.75) | 0.040   |
| Secondary                           | 53.0                           | 5.85              | (3.47–9.87)  | <0.0005 | 2.80                | (1.56–5.04) | 0.001   |
| Post-secondary / Diploma            | 27.2                           | 1.94              | (1.30–2.90)  | 0.001   | 1.15                | (0.74–1.79) | 0.538   |
| University degree or higher         | 16.2                           | 1.00              | Referent     |         | 1.00                | Referent    |         |
| Occupational type†                  |                                |                   |              | <0.0005 |                     |             |         |
| Professional / executive            | 21.4                           | 1.00              | Referent     |         |                     |             |         |
| Administrative / service            | 28.0                           | 1.43              | (1.02–2.00)  | 0.038   |                     |             |         |
| Blue-collar worker                  | 61.6                           | 5.88              | (3.67–9.43)  | <0.0005 |                     |             |         |
| Unemployed                          | 36.8                           | 2.14              | (1.05–4.37)  | 0.037   |                     |             |         |
| Others                              | 26.0                           | 1.29              | (0.86–1.93)  | 0.223   |                     |             |         |
| Mode of detection                   |                                |                   |              | <0.0005 |                     | <0.0005     |         |
| Voluntary screening                 | 12.6                           | 1.00              | Referent     |         | 1.00                | Referent    |         |
| Medical care                        | 45.5                           | 5.81              | (3.96–8.53)  | <0.0005 | 3.66                | (2.39–5.59) | <0.0005 |
| Routine programmatic HIV screening‡ | 34.0                           | 3.58              | (2.49–5.16)  | <0.0005 | 2.66                | (1.79–3.95) | <0.0005 |
| Others                              | 20.7                           | 1.81              | (0.99–3.32)  | 0.053   | 1.41                | (0.74–2.70) | 0.294   |
| Mode of sexual transmission         |                                |                   |              |         |                     |             |         |
| Homosexual/bisexual                 | 19.6                           | 1.00              | Referent     |         | 1.00                | Referent    |         |
| Heterosexual                        | 53.0                           | 4.60              | (3.52–6.02)  | <0.0005 | 2.17                | (1.55–3.04) | <0.0005 |
| Type of sexual partner†             |                                |                   |              | <0.0005 |                     |             |         |
| Regular only                        | 36.0                           | 1.00              | Referent     |         |                     |             |         |
| Regular and casual only             | 23.3                           | 0.54              | (0.37–0.78)  | 0.001   |                     |             |         |
| Sex workers and social escorts      | 47.8                           | 1.63              | (1.06–2.48)  | 0.025   |                     |             |         |
| History of STIs                     |                                |                   |              |         |                     |             |         |
| Yes                                 | 25.6                           | 1.00              | Referent     |         |                     |             |         |
| No                                  | 31.0                           | 1.31              | (0.99–1.73)  | 0.060   |                     |             |         |

cOR, crude odds ratio; aOR, adjusted odds ratio; STIs, sexually transmitted infections.

‡ Routine programmatic HIV screening includes screening programmes for those with STIs, hospital inpatients and those identified through contact tracing.

† Missing data were imputed.

## DISCUSSION

This study found that slightly less than half of the sexually-transmitted HIV-positive persons reported no previous HIV test prior to diagnosis. Close to two-thirds of the HIV-positive persons diagnosed at late-stage HIV infection did not have previous HIV tests, more than twice the proportion among those diagnosed early (29.4%). The median duration from the last negative test to HIV diagnosis was 3.8 years among HIV-positive persons with late-stage HIV infection, double that of those diagnosed early. These findings highlight the importance of regular HIV testing for early diagnosis so as to secure optimal outcomes in the HIV care cascade.

Anonymous test sites were the most popular among HIV-positive persons for their last negative HIV test prior to diagnosis (Fig. 2). At-risk individuals who go to anonymous test sites are more likely to have HIV testing on a regular basis or at a shorter inter-test interval, as reflected by the higher proportion of HIV-positive persons diagnosed early (79.4%) among those who were last tested negative at these test sites and the shorter median duration from the last negative test to HIV diagnosis compared with other test sites (1.5 vs 2.5 years). To encourage voluntary outpatient screening by reducing the stigma associated with seeking HIV testing, the Ministry of Health introduced anonymous HIV testing using oral-fluid or blood-based rapid HIV test kits at selected GP clinics and test sites run by community-based organisations in August 2007.<sup>10</sup> Anonymous testing offers privacy and confidentiality that encourages more people to check their HIV status. There are now ten anonymous HIV test sites in Singapore, comprising nine GP clinics and a test site operated by Action for AIDS (AfA), a local non-governmental HIV/AIDS community-based organization.<sup>11</sup> To make voluntary HIV screening more accessible and convenient in Singapore, AfA launched the first Mobile Testing & Counselling Service which provides anonymous HIV and syphilis testing on wheels in December 2011.<sup>12</sup> The number of HIV

1  
2 tests conducted at anonymous test sites increased by 25% from 13,900 in 2013 to 17,400  
3  
4  
5 in 2017.<sup>13</sup>  
6

7 Four common risk factors were associated with no previous HIV testing in  
8  
9 multivariable analyses in both early and late stages of HIV infection at diagnosis: older  
10  
11 age, lower educational level, detection in the course of medical care and heterosexual  
12  
13 transmission (Tables 2 and 3). Older persons may perceive themselves to be at lower risk  
14  
15 of HIV infection, or may be less aware of HIV and more reluctant to undergo HIV testing.  
16  
17 Lower educational level was an impediment in having HIV tests among men having sex  
18  
19 with men (MSM) in some studies.<sup>14-17</sup> HIV testing is most likely to be initiated only during  
20  
21 medical care due to clinical suspicion of HIV infection based on disease presentations or  
22  
23 risk profiles. Error! Bookmark not defined. In a local study of HIV-positive men, those of older age  
24  
25 ( $\geq 30$  years) at diagnosis and infected via heterosexual transmission were more likely to be  
26  
27 detected through medical care as opposed to voluntary screening.<sup>18</sup> Our finding indicated  
28  
29 the need to increase HIV testing rates among persons at high risk of HIV infection with  
30  
31 these epidemiological risk factors.  
32  
33  
34  
35  
36

37 The proportion of persons infected with HIV via heterosexual transmission with no  
38  
39 previous HIV test prior to diagnosis (70.1%) was about 2.5 times that of those infected via  
40  
41 homosexual/bisexual transmission (27.5%). Hence they were also less likely to have  
42  
43 recent HIV infection (RHI) at diagnosis, as shown in a local study in which the proportion  
44  
45 of RHI was significantly lower in heterosexual men than in men who have sex with men  
46  
47 (MSM) (11.1% vs. 23.4%).<sup>19</sup> Similarly, in the United States, heterosexuals at high risk are  
48  
49 known to have lower testing frequency than other groups such as MSM.<sup>20</sup> According to a  
50  
51 systematic review of 19 studies that evaluated behavioural preventive interventions in low-  
52  
53 and middle-income countries, heterosexual men remained under-represented in HIV  
54  
55 prevention efforts.<sup>21</sup> In Singapore, the outreach programme run by AfA includes  
56  
57 edutainment shows, regular condom and collateral distributions to heterosexuals who  
58  
59  
60

1  
2  
3 engage in high-risk sexual activities at venues they frequent, so as to increase their  
4  
5 knowledge about HIV/STIs and preventive methods, and encourage more voluntary  
6  
7 testing.<sup>22</sup>  
8

9  
10 In a separate analysis among cases diagnosed at early-stage HIV infection, women  
11  
12 were less likely to have previous HIV testing prior to their diagnosis. HIV/AIDS cases  
13  
14 diagnosed in Singapore are predominantly men with male to female ratio of 9:1. Women  
15  
16 who believe that their sexual partners are faithful in the relationship are less likely to  
17  
18 perceive themselves to be at risk of HIV infection. Among HIV-positive persons who had  
19  
20 been diagnosed early, those of Malay ethnicity were more likely not to have had previous  
21  
22 testing for HIV prior to diagnosis when compared with ethnic Chinese. This could be due  
23  
24 to HIV-related stigma arising from the influence of culture and religiosity. In Malaysia, a  
25  
26 study conducted in 2012-2013 found that Malay Muslim HIV patients who disclosed their  
27  
28 illness had significantly higher total stigma level than the non-disclosure group.<sup>23</sup>  
29  
30

31  
32 As this study identified a significant proportion of late-stage HIV infection (63.9%)  
33  
34 among HIV-positive persons who did not have previous HIV tests, healthcare providers  
35  
36 should have a higher index of suspicion for HIV infection among at-risk groups, and  
37  
38 recommend a HIV test where appropriate<sup>24</sup>. In a study on HIV testing behaviour among  
39  
40 HIV-uninfected, at-risk adolescents and those who were HIV-infected in the United States,  
41  
42 67% of the high-risk group and 53% of the HIV-infected group cited recommendation by  
43  
44 healthcare professionals as a reason to undergo HIV testing.<sup>25</sup> In a study among  
45  
46 heterosexuals at high risk of HIV infection in New York City, facilitators of past-year HIV  
47  
48 testing common to both genders included STI testing or STI diagnosis, peer norms  
49  
50 supporting HIV testing, and HIV testing access.<sup>26</sup> Independent factors associated with  
51  
52 regular HIV testing behavior among MSM in China included perceived risk, greater  
53  
54 knowledge of HIV testing and having a STI test in the past year.<sup>27</sup> Individuals, especially  
55  
56 those at high risk of STIs and HIV, would benefit from having better knowledge about HIV  
57  
58  
59  
60

1  
2 and the symptoms related to acute or advanced HIV infection, as well as the benefits of  
3  
4  
5 early diagnosis and linkage to care.<sup>24</sup>  
6

7 HIV infection has a long clinical latency period during which infected individuals  
8  
9 may show no symptoms. Relying on symptom-based HIV diagnosis would lead to late  
10  
11 diagnosis, missing the opportunity of early detection.<sup>28,29</sup> Hence, it is crucial to provide a  
12  
13 system that can support HIV testing with minimal inconvenience, so as to encourage  
14  
15 greater uptake of HIV screening among those who are at risk regardless of whether they  
16  
17 are asymptomatic or symptomatic. In our study, about three-quarters of HIV-positive who  
18  
19 had no previous HIV testing deemed that it was “not necessary to test”, and the proportion  
20  
21 was significantly higher among those with late-stage than early-stage HIV infection at  
22  
23 diagnosis (76.3% vs. 69.1%) (Fig. 3), which likely represents a lack of knowledge of their  
24  
25 own risk of HIV infection despite ongoing risk behaviour. The Singapore Health Promotion  
26  
27 Board has been working with partner organisations to conduct programmes and  
28  
29 campaigns targeted at high-risk individuals to urge them to go for early and regular HIV  
30  
31 testing.<sup>30</sup> Various educational programmes on HIV prevention and management are  
32  
33 conducted using a lifestyle approach in order to reach out to at-risk individuals through  
34  
35 social settings.  
36  
37  
38  
39  
40

41 There are several limitations in this study. Our study used the epidemiological data  
42  
43 collected in the National HIV Registry which was not designed to investigate determinants  
44  
45 of previous HIV testing. Hence, not all potential confounding factors could be included in  
46  
47 our study, and information on drivers and barriers of HIV testing was unavailable.  
48  
49 Qualitative studies are needed to delineate the processes underlying different patterns of  
50  
51 testing in local context<sup>31</sup>. As testing-related variables were ascertained based on self-  
52  
53 reporting by HIV/AIDS cases, some extent of misclassification due to recall bias could not  
54  
55 be avoided.  
56  
57  
58  
59  
60

1  
2  
3 In conclusion, the proportion of cases who had never been tested for HIV prior to  
4 HIV diagnosis was 45.1%. Our study findings highlight the need for concerted efforts to  
5 raise awareness of the importance of early and regular HIV testing and boost its uptake by  
6 making HIV testing more accessible and less discriminatory, particularly among the high-  
7 risk groups in Singapore.  
8  
9  
10  
11  
12  
13  
14  
15  
16  
17

### 18 **Acknowledgments**

19  
20 We thank the staff at the Singapore National HIV Registry for extraction of the HIV  
21 epidemiological database, and providing the de-identified data for this study.  
22  
23  
24  
25  
26  
27

### 28 **Contributors**

29  
30 LWA conceived the study, did statistical analysis and wrote the first draft of the  
31 manuscript. All authors (LWA, MPHST, ICB, CSW, SA, VJML, AC, YSL) contributed to  
32 data interpretation, revised the manuscript and approved the submission.  
33  
34  
35  
36  
37  
38

### 39 **Funding**

40  
41 This research received no specific grant from any funding agency in the public,  
42 commercial or not-for-profit sectors.  
43  
44  
45  
46  
47

### 48 **Competing interests**

49  
50 None declared.  
51  
52  
53  
54

### 55 **Patient consent for publication**

56  
57 Not applicable.  
58  
59  
60



## Provenance and peer review

Not commissioned; externally peer reviewed.

## Data availability statement

All data relevant to the study are included in the article.

## Ethics statement

Research approval for this study was provided by the Ministry of Health, Singapore. As the data was collected under the Infectious Diseases Act and analyses were performed on an anonymized dataset, informed consent was not required for this study.

## REFERENCES

1. UNAIDS. 90–90–90—An ambitious treatment target to help end the AIDS epidemic. Available at <http://www.unaids.org/en/resources/documents/2017/90-90-90>. (accessed 27 July 2018).
2. Lee VJM. Where are we with 90-90-90 in Singapore? Webinar 2: Update on HIV Treatment and Cure. Panel presentation at the 12th Singapore AIDS Conference, 5 December 2020. Available at <https://afa.org.sg/whatwedo/advocate/sac-12th-2020> (accessed 18 December 2020).
3. Ministry of Health, Singapore. Update on the HIV/AIDS situation in Singapore 2019 (June 2020). Available at <https://www.moh.gov.sg/resources-statistics/infectious-disease-statistics/hiv-stats/update-on-the-hiv-aids-situation-in-singapore-2019-june-2020> (accessed 6 December 2020).
4. Cutter, JL, Lim WY, Ang LW, Tun Y, James L, Chew SK. HIV in Singapore – Past, present, and future. *AIDS Educ Prev*. 2004;16:3 Suppl. A:110-8.
5. Tey JS, Ang LW, Tay J, Cutter JL, James L, Chew SK, Goh KT. Determinants of late-stage HIV disease at diagnosis in Singapore, 1996 to 2009. *Ann Acad Med Singapore*. 2012;41(5):194-9.

- 1  
2  
3 6. Chadborn TR, Delpech VC, Sabin CA, Sinka K, Evans BG. The late diagnosis and  
4 consequent short-term mortality of HIV-infected heterosexuals (England and Wales,  
5 2000-2004). *AIDS* 2006;20(18):2371-9.
- 6  
7  
8 7. Ang LW, Tey SH and James L. Determinants of late-stage human  
9 immunodeficiency virus infection at first diagnosis. *Singapore Epidemiol News Bull.*  
10 2008;34(3):47-50.
- 11  
12  
13 8. Ministry of Health, Singapore. Infectious Diseases Act. Available at  
14 <https://www.moh.gov.sg/policies-and-legislation/infectious-diseases-act> (accessed  
15 31 August 2020).
- 16  
17  
18 9. Stekhoven DJ, Buhlmann P. MissForest - non-parametric missing value imputation  
19 for mixed-type data. *Bioinformatics*. 2012;28(1): 112-8. doi:  
20 10.1093/bioinformatics/btr597.
- 21  
22  
23 10. HealthHub, Singapore. Get tested for HIV in minutes. Last reviewed on 14  
24 November 2018. Available at [https://www.healthhub.sg/live-](https://www.healthhub.sg/live-healthy/371/get_tested_HIV_in_minutes)  
25 [healthy/371/get\\_tested\\_HIV\\_in\\_minutes](https://www.healthhub.sg/live-healthy/371/get_tested_HIV_in_minutes) (accessed 4 May 2019).
- 26  
27  
28 11. Zhang Y, Kurupatham L, Badaruddin H, Huang F, Low C, Cui L, et al. Evaluation of  
29 the HIV surveillance system in Singapore. *Singapore Epidemiol News Bull.*  
30 2016;42(2):16-21.
- 31  
32  
33 12. Action for AIDS, Singapore. Annual Report 2011. Available at  
34 <https://afa.org.sg/portfolio-item/annualreport2011/> (accessed 1 July 2021).
- 35  
36  
37 13. Ministry of Health, Singapore. Communicable Diseases Surveillance in Singapore  
38 2017. Communicable Diseases Division, Ministry of Health, Singapore, 2018.
- 39  
40  
41 14. Li R, Pan X, Ma Q, Wang H, He L, Jiang T, Wang D, Zhang Y, Zhang X, Xia S.  
42 Prevalence of prior HIV testing and associated factors among MSM in Zhejiang  
43 Province, China: a cross-sectional study. *BMC Public Health*. 2016;16(1):1152.
- 44  
45  
46 15. Mitchell JW, Horvath KJ. Factors associated with regular HIV testing among a  
47 sample of US MSM with HIV-negative main partners. *J Acquir Immune Defic Syndr.*  
48 2013;64(4):417-23.
- 49  
50  
51 16. Brito AM, Kendall C, Kerr L, Mota RM, Guimarães MD, Dourado I, Pinho AA,  
52 Benzaken AS, Brignol S, Reingold AL. Factors associated with low levels of HIV  
53 testing among men who have sex with men (MSM) in Brazil. *PLoS One*.  
54 2015;10(6):e0130445.
- 55  
56  
57  
58  
59  
60

17. Chantal den Daas, Martine Doppen, Axel J Schmidt, Eline Op de Coul. Determinants of never having tested for HIV among MSM in the Netherlands. *BMJ Open*. 2016;6(1):e009480.
18. Ang LW, Tey SH, James L. HIV-positive cases detected during medical care versus voluntary HIV screening in Singapore – how are they different? *Singapore Epidemiol News Bull*. 2009;35(3):52-6.
19. Ang LW, Low C, Wong CS, Boudville IC, Toh MPHS, Archuleta S, Lee VJM, Leo YS, Chow A, Lin RT. Epidemiological factors associated with recent HIV infection among newly-diagnosed cases in Singapore, 2013-2017. *BMC Public Health*. 2021;21(1):430. doi: 10.1186/s12889-021-10478-5.
20. Jenness SM, Murrill CS, Liu KL, Wendel T, Begier E, Hagan H. Missed opportunities for HIV testing among high-risk heterosexuals. *Sex Transm Dis*. 2009;36(11):704-10.
21. Townsend L, Mathews C, Zembe Y. A systematic review of behavioral interventions to prevent HIV infection and transmission among heterosexual, adult men in low- and middle-income countries. *Prev Sci*. 2013;14(1):88-105.
22. Action for AIDS, Singapore. HSO: Heterosexual Outreach. Available at <https://afa.org.sg/whatwedo/educate/hso/> (accessed 30 June 2021).
23. Fadzil NA, Othman Z, Mustafa M. Stigma in Malay patients with HIV/AIDS in Malaysia. *Int Medical J*. 2016;23(4):1-4.
24. Darling KE, Hachfeld A, Cavassini M, Kirk O, Furrer H, Wandeler G. Late presentation to HIV care despite good access to health services: current epidemiological trends and how to do better. *Swiss Med Wkly*. 2016;146:w14348.
25. Murphy DA, Mitchell R, Vermund SH, Futterman D; Adolescent Medicine HIV/AIDS Research Network. Factors associated with HIV testing among HIV-positive and HIV-negative high-risk adolescents: the REACH Study. *Reaching for Excellence in Adolescent Care and Health*. *Pediatrics*. 2002;110(3):e36.
26. Gwadz M, Cleland CM, Kutnick A, Leonard NR, Ritchie AS, Lynch L, Banfield A, McCright-Gill T, Del Olmo M, Martinez B. Factors associated with recent HIV testing among heterosexuals at high risk for HIV infection in New York City. *Front Public Health*. 2016;4:76. doi: 10.3389/fpubh.2016.00076.
27. Zhao Y, Bromberg DJ, Khoshnood K, Sheng Y. Factors associated with regular HIV testing behavior of MSM in China: a cross-sectional survey informed by theory of

- 1  
2 triadic influence. *Int J STD AIDS*. 2020;31(14):1340-1351. doi:  
3 10.1177/0956462420953012.  
4  
5  
6 28. Rüütel K, Lemsalu L, Lätt S, Epstein J, On Behalf Of OptTEST By HiE. Missed  
7 opportunities for HIV testing in people diagnosed with HIV, Estonia, 2014 to 2015.  
8 *Euro Surveill*. 2019;24(15).  
9  
10  
11 29. Inghels M, Niangoran S, Minga A, Yoboue JM, Dohoun L, Yao A, et al. Missed  
12 opportunities for HIV testing among newly diagnosed HIV-infected adults in Abidjan,  
13 Côte d'Ivoire. *PLoS One*. 2017;12(10):e0185117.  
14  
15  
16 30. Ministry of Health, Singapore. Update on the HIV/AIDS Situation in Singapore 2019  
17 (June 2020). Available at [https://www.moh.gov.sg/resources-statistics/infectious-](https://www.moh.gov.sg/resources-statistics/infectious-disease-statistics/hiv-stats/update-on-the-hiv-aids-situation-in-singapore-2019-june-2020)  
18 [disease-statistics/hiv-stats/update-on-the-hiv-aids-situation-in-singapore-2019-](https://www.moh.gov.sg/resources-statistics/infectious-disease-statistics/hiv-stats/update-on-the-hiv-aids-situation-in-singapore-2019-june-2020)  
19 [june-2020](https://www.moh.gov.sg/resources-statistics/infectious-disease-statistics/hiv-stats/update-on-the-hiv-aids-situation-in-singapore-2019-june-2020) (accessed 30 June 2021).  
20  
21  
22  
23 31. Tan RKJ, Kaur N, Chen MI, Wong CS. Developing a typology of HIV/STI testing  
24 patterns among gay, bisexual, and queer men: a framework to guide interventions.  
25 *Qual Health Res*. 2020;30(4):610-621. doi: 10.1177/1049732319870174.  
26  
27  
28  
29  
30  
31  
32

### 33 **Figure captions**

34  
35 Figure 1. Percentage of sexually transmitted HIV-positive persons who did not have HIV  
36 tests prior to diagnosis by stage of HIV infection at diagnosis in Singapore, 2012–2017  
37  
38

39  
40 Figure 2. Distribution (%) of test sites of sexually transmitted HIV-positive persons for their  
41 last negative HIV test result prior to diagnosis by stage of HIV infection at diagnosis in  
42 Singapore, 2012–2017  
43

44 DRC: Drug rehabilitation centre; DSC: Department of STI Control  
45

46  
47 Figure 3. Distribution (%) of reasons for no previous HIV test prior to diagnosis among  
48 sexually transmitted HIV-positive persons by stage of HIV infection at diagnosis in  
49 Singapore, 2012–2017  
50  
51  
52  
53  
54  
55  
56  
57  
58  
59  
60

1  
2  
3  
4  
5  
6  
7  
8  
9  
10  
11  
12  
13  
14  
15  
16  
17  
18  
19  
20  
21  
22  
23  
24  
25  
26  
27  
28  
29  
30  
31  
32  
33  
34  
35  
36  
37  
38  
39  
40  
41  
42  
43  
44  
45  
46  
47  
48  
49  
50  
51  
52  
53  
54  
55  
56  
57  
58  
59  
60

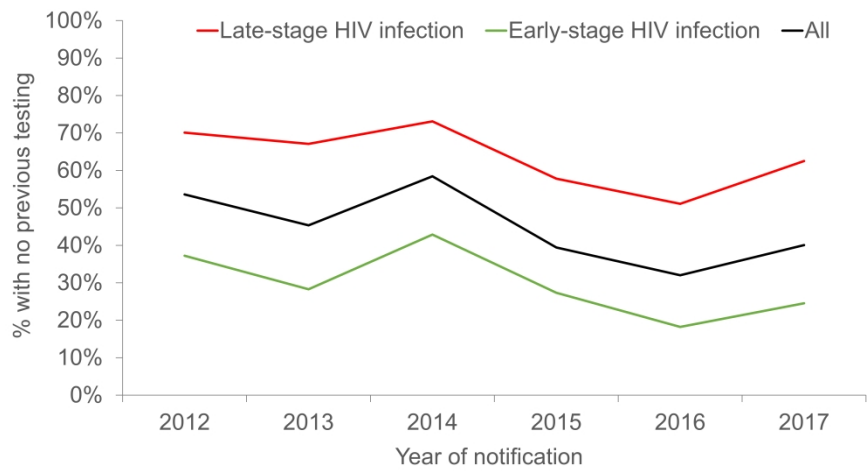

Figure 1. Percentage of sexually transmitted HIV/AIDS cases who did not have HIV tests prior to diagnosis by stage of HIV infection at diagnosis in Singapore, 2012-2017.

338x190mm (600 x 600 DPI)

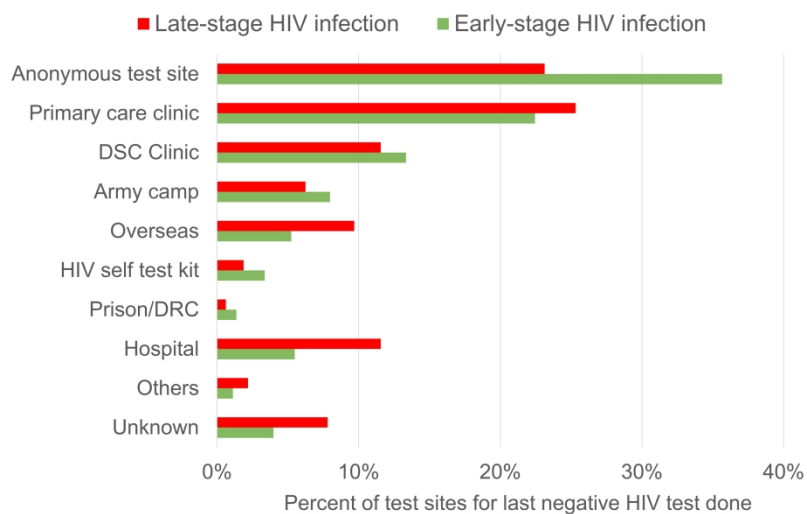

Figure 2. Distribution (%) of test sites of sexually transmitted HIV-positive persons for their last negative HIV test result prior to diagnosis by stage of HIV infection at diagnosis in Singapore, 2012–2017

338x190mm (300 x 300 DPI)

1  
2  
3  
4  
5  
6  
7  
8  
9  
10  
11  
12  
13  
14  
15  
16  
17  
18  
19  
20  
21  
22  
23  
24  
25  
26  
27  
28  
29  
30  
31  
32  
33  
34  
35  
36  
37  
38  
39  
40  
41  
42  
43  
44  
45  
46  
47  
48  
49  
50  
51  
52  
53  
54  
55  
56  
57  
58  
59  
60

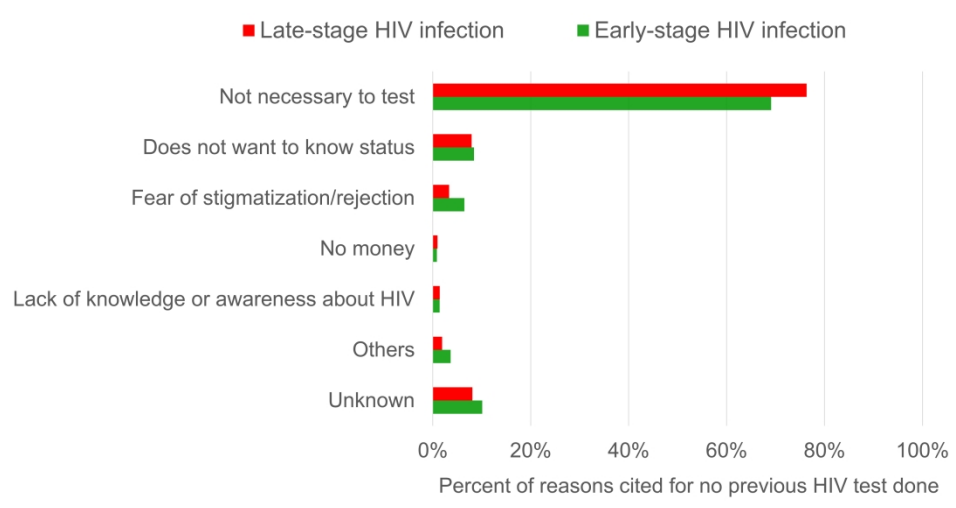

Figure 3. Distribution (%) of reasons for no previous HIV test prior to diagnosis among sexually transmitted HIV-positive persons by stage of HIV infection at diagnosis in Singapore, 2012–2017

338x190mm (300 x 300 DPI)

## Epidemiological factors associated with the absence of previous HIV testing among HIV-positive persons in Singapore, 2012 to 2017

Li Wei Ang, Matthias Paul Han Sim Toh, Irving Charles Boudville, Chen Seong Wong,  
Sophia Archuleta, Vernon Jian Ming Lee, Angela Chow, Yee Sin Leo

**Supplementary Table. Characteristics (%) of sexually transmitted HIV-positive persons who were included and excluded from the study, 2012–2017.**

| Characteristic              | All<br>(n=2,579) | Included<br>(n=2,188) | Excluded<br>(n=391) | P-value |
|-----------------------------|------------------|-----------------------|---------------------|---------|
| Age group (years)           |                  |                       |                     | <0.0005 |
| 15–24                       | 262 (10.2)       | 231 (10.6)            | 31 (7.9)            |         |
| 25–34                       | 619 (24.0)       | 548 (25.0)            | 71 (18.2)           |         |
| 35–44                       | 678 (26.3)       | 567 (25.9)            | 111 (28.4)          |         |
| 45–54                       | 573 (22.2)       | 487 (22.3)            | 86 (22.0)           |         |
| 55–64                       | 335 (13.0)       | 274 (12.5)            | 61 (15.6)           |         |
| ≥65                         | 112 (4.3)        | 81 (3.7)              | 31 (7.9)            |         |
| Gender                      |                  |                       |                     | 0.659   |
| Male                        | 2,408 (93.4)     | 2,045 (93.5)          | 363 (92.8)          |         |
| Female                      | 171 (6.6)        | 143 (6.5)             | 28 (7.2)            |         |
| Ethnic group                |                  |                       |                     | 0.109   |
| Chinese                     | 1,837 (71.2)     | 1,571 (71.8)          | 266 (68.0)          |         |
| Malay                       | 486 (18.8)       | 413 (18.9)            | 73 (18.7)           |         |
| Indian                      | 152 (5.9)        | 122 (5.6)             | 30 (7.7)            |         |
| Others                      | 104 (4.0)        | 82 (3.7)              | 22 (5.6)            |         |
| Marital status              |                  |                       |                     | 0.020   |
| Never married               | 1,747 (67.7)     | 1,506 (68.8)          | 241 (61.6)          |         |
| Married                     | 572 (22.2)       | 469 (21.4)            | 103 (26.3)          |         |
| Separated/Divorced/Widowed  | 260 (10.1)       | 213 (9.7)             | 47 (12.0)           |         |
| Educational level           |                  |                       |                     | 0.005   |
| No formal / Primary         | 189 (7.3)        | 161 (7.4)             | 28 (7.2)            |         |
| Secondary                   | 305 (11.8)       | 263 (12.0)            | 42 (10.7)           |         |
| Post-secondary / Diploma    | 1,759 (68.2)     | 1,466 (67.0)          | 293 (74.9)          |         |
| University degree or higher | 318 (12.3)       | 290 (13.3)            | 28 (7.2)            |         |
| Unknown                     | 8 (0.3)          | 8 (0.4)               | 0 (0.0)             |         |
| Occupational type           |                  |                       |                     | <0.0005 |
| Professional / executive    | 531 (20.6)       | 463 (21.2)            | 68 (17.4)           |         |
| Administrative / service    | 1,044 (40.5)     | 904 (41.3)            | 140 (35.8)          |         |
| Blue-collar worker          | 337 (13.1)       | 285 (13.0)            | 52 (13.3)           |         |
| Unemployed                  | 89 (3.5)         | 69 (3.2)              | 20 (5.1)            |         |
| Others                      | 354 (13.7)       | 302 (13.8)            | 52 (13.3)           |         |
| Unknown                     | 224 (8.7)        | 165 (7.5)             | 59 (15.1)           |         |



*(Continued)*

| <b>Characteristic</b>                           | <b>All<br/>(n=2,579)</b> | <b>Included<br/>(n=2,188)</b> | <b>Excluded<br/>(n=391)</b> | <b>P-value</b> |
|-------------------------------------------------|--------------------------|-------------------------------|-----------------------------|----------------|
| Mode of detection                               |                          |                               |                             | <0.0005        |
| Voluntary screening                             | 498 (19.3)               | 452 (20.7)                    | 46 (11.8)                   |                |
| Medical care                                    | 1,189 (46.1)             | 1,001 (45.7)                  | 188 (48.1)                  |                |
| Routine programmatic HIV screening <sup>†</sup> | 724 (28.1)               | 615 (28.1)                    | 109 (27.9)                  |                |
| Others                                          | 168 (6.5)                | 120 (5.5)                     | 48 (12.3)                   |                |
| Mode of HIV transmission                        |                          |                               |                             | <0.0005        |
| Homosexual/bisexual                             | 1,478 (57.3)             | 1,287 (58.8)                  | 191 (48.8)                  |                |
| Heterosexual                                    | 1,101 (42.7)             | 901 (41.2)                    | 200 (51.2)                  |                |
| Type of sexual partners                         |                          |                               |                             | <0.0005        |
| Regular only                                    | 301 (11.7)               | 246 (11.2)                    | 55 (14.1)                   |                |
| Regular and casual only                         | 1,583 (61.4)             | 1357 (62.0)                   | 226 (57.8)                  |                |
| Sex workers and social escorts                  | 677 (26.3)               | 576 (26.3)                    | 101 (25.8)                  |                |
| Unknown                                         | 18 (0.7)                 | 9 (0.4)                       | 9 (2.3)                     |                |
| Self-reported history of STIs                   |                          |                               |                             | 0.898          |
| No                                              | 1,965 (76.2)             | 1,668 (76.2)                  | 297 (76.0)                  |                |
| Yes                                             | 614 (23.8)               | 520 (23.8)                    | 94 (24.0)                   |                |

STIs, sexually transmitted infections.

<sup>†</sup> Routine programmatic HIV screening includes screening programmes for those with STIs, hospital inpatients and those identified through contact tracing.

## Epidemiological factors associated with the absence of previous HIV testing among HIV-positive persons in Singapore, 2012 to 2017

### STROBE 2007 (v4) Statement—Checklist of items that should be included in reports of *cross-sectional studies*

| Section/Topic            | Item # | Recommendation                                                                                                                                                                       | Reported on page # |
|--------------------------|--------|--------------------------------------------------------------------------------------------------------------------------------------------------------------------------------------|--------------------|
| Title and abstract       | 1      | (a) Indicate the study's design with a commonly used term in the title or the abstract                                                                                               | 2                  |
|                          |        | (b) Provide in the abstract an informative and balanced summary of what was done and what was found                                                                                  | 2-3                |
| <b>Introduction</b>      |        |                                                                                                                                                                                      |                    |
| Background/rationale     | 2      | Explain the scientific background and rationale for the investigation being reported                                                                                                 | 5                  |
| Objectives               | 3      | State specific objectives, including any prespecified hypotheses                                                                                                                     | 5-6                |
| <b>Methods</b>           |        |                                                                                                                                                                                      |                    |
| Study design             | 4      | Present key elements of study design early in the paper                                                                                                                              | 6-7                |
| Setting                  | 5      | Describe the setting, locations, and relevant dates, including periods of recruitment, exposure, follow-up, and data collection                                                      | 6-7                |
| Participants             | 6      | (a) Give the eligibility criteria, and the sources and methods of selection of participants                                                                                          | 6-7                |
| Variables                | 7      | Clearly define all outcomes, exposures, predictors, potential confounders, and effect modifiers. Give diagnostic criteria, if applicable                                             | 6-7                |
| Data sources/measurement | 8*     | For each variable of interest, give sources of data and details of methods of assessment (measurement). Describe comparability of assessment methods if there is more than one group | 6-7                |
| Bias                     | 9      | Describe any efforts to address potential sources of bias                                                                                                                            | -                  |
| Study size               | 10     | Explain how the study size was arrived at                                                                                                                                            | 8                  |
| Quantitative variables   | 11     | Explain how quantitative variables were handled in the analyses. If applicable, describe which groupings were chosen and why                                                         | 8                  |
| Statistical methods      | 12     | (a) Describe all statistical methods, including those used to control for confounding                                                                                                | 8                  |
|                          |        | (b) Describe any methods used to examine subgroups and interactions                                                                                                                  | 8                  |

|                          |     |                                                                                                                                                                                                              |       |
|--------------------------|-----|--------------------------------------------------------------------------------------------------------------------------------------------------------------------------------------------------------------|-------|
|                          |     | (c) Explain how missing data were addressed                                                                                                                                                                  | 8     |
|                          |     | (d) If applicable, describe analytical methods taking account of sampling strategy                                                                                                                           | -     |
|                          |     | (e) Describe any sensitivity analyses                                                                                                                                                                        | -     |
| <b>Results</b>           |     |                                                                                                                                                                                                              |       |
| Participants             | 13* | (a) Report numbers of individuals at each stage of study—eg numbers potentially eligible, examined for eligibility, confirmed eligible, included in the study, completing follow-up, and analysed            | 8     |
|                          |     | (b) Give reasons for non-participation at each stage                                                                                                                                                         | -     |
|                          |     | (c) Consider use of a flow diagram                                                                                                                                                                           | -     |
| Descriptive data         | 14* | (a) Give characteristics of study participants (eg demographic, clinical, social) and information on exposures and potential confounders                                                                     | 9-11  |
|                          |     | (b) Indicate number of participants with missing data for each variable of interest                                                                                                                          | 9-11  |
| Outcome data             | 15* | Report numbers of outcome events or summary measures                                                                                                                                                         | 9-11  |
| Main results             | 16  | (a) Give unadjusted estimates and, if applicable, confounder-adjusted estimates and their precision (eg, 95% confidence interval). Make clear which confounders were adjusted for and why they were included | 11-14 |
|                          |     | (b) Report category boundaries when continuous variables were categorized                                                                                                                                    | 14-16 |
|                          |     | (c) If relevant, consider translating estimates of relative risk into absolute risk for a meaningful time period                                                                                             | -     |
| Other analyses           | 17  | Report other analyses done—eg analyses of subgroups and interactions, and sensitivity analyses                                                                                                               | -     |
| <b>Discussion</b>        |     |                                                                                                                                                                                                              |       |
| Key results              | 18  | Summarise key results with reference to study objectives                                                                                                                                                     | 17    |
| Limitations              | 19  | Discuss limitations of the study, taking into account sources of potential bias or imprecision. Discuss both direction and magnitude of any potential bias                                                   | 20    |
| Interpretation           | 20  | Give a cautious overall interpretation of results considering objectives, limitations, multiplicity of analyses, results from similar studies, and other relevant evidence                                   | 17    |
| Generalisability         | 21  | Discuss the generalisability (external validity) of the study results                                                                                                                                        | 17-20 |
| <b>Other information</b> |     |                                                                                                                                                                                                              |       |
| Funding                  | 22  | Give the source of funding and the role of the funders for the present study and, if applicable, for the original study on which the present article is based                                                | -     |

\*Give information separately for cases and controls in case-control studies and, if applicable, for exposed and unexposed groups in cohort and cross-sectional studies.

1  
2 **Note:** An Explanation and Elaboration article discusses each checklist item and gives methodological background and published examples of transparent reporting. The STROBE  
3 checklist is best used in conjunction with this article (freely available on the Web sites of PLoS Medicine at <http://www.plosmedicine.org/>, Annals of Internal Medicine at  
4 <http://www.annals.org/>, and Epidemiology at <http://www.epidem.com/>). Information on the STROBE Initiative is available at [www.strobe-statement.org](http://www.strobe-statement.org).  
5  
6  
7  
8  
9  
10  
11  
12  
13  
14  
15  
16  
17  
18  
19  
20  
21  
22  
23  
24  
25  
26  
27  
28  
29  
30  
31  
32  
33  
34  
35  
36  
37  
38  
39  
40  
41  
42  
43  
44  
45  
46

For peer review only
