# Supplementary material for: Epidemiological factors associated with the absence of previous HIV testing among HIV-positive persons in Singapore, 2012–2017
Source: PubMed Central journal article supplement — BMJ Open. 2021 Aug 17;11(8):e050133. doi: 10.1136/bmjopen-2021-050133 (PMC8372883; doi:10.1136/bmjopen-2021-050133), 2021-08-17
Supplement: bmjopen-2021-050133supp001.pdf [file bmjopen-2021-050133supp001.pdf]

## Epidemiological factors associated with the absence of previous HIV testing among HIV-positive persons in Singapore, 2012 to 2017

Li Wei Ang, Matthias Paul Han Sim Toh, Irving Charles Boudville, Chen Seong Wong, Sophia Archuleta, Vernon Jian Ming Lee, Angela Chow, Yee Sin Leo

**Supplementary Table. Characteristics (%) of sexually transmitted HIV-positive persons who were included and excluded from the study, 2012–2017.**

| Characteristic              | All<br>(n=2,579) | Included<br>(n=2,188) | Excluded<br>(n=391) | P-value |
|-----------------------------|------------------|-----------------------|---------------------|---------|
| Age group (years)           |                  |                       |                     | <0.0005 |
| 15–24                       | 262 (10.2)       | 231 (10.6)            | 31 (7.9)            |         |
| 25–34                       | 619 (24.0)       | 548 (25.0)            | 71 (18.2)           |         |
| 35–44                       | 678 (26.3)       | 567 (25.9)            | 111 (28.4)          |         |
| 45–54                       | 573 (22.2)       | 487 (22.3)            | 86 (22.0)           |         |
| 55–64                       | 335 (13.0)       | 274 (12.5)            | 61 (15.6)           |         |
| ≥65                         | 112 (4.3)        | 81 (3.7)              | 31 (7.9)            |         |
| Gender                      |                  |                       |                     | 0.659   |
| Male                        | 2,408 (93.4)     | 2,045 (93.5)          | 363 (92.8)          |         |
| Female                      | 171 (6.6)        | 143 (6.5)             | 28 (7.2)            |         |
| Ethnic group                |                  |                       |                     | 0.109   |
| Chinese                     | 1,837 (71.2)     | 1,571 (71.8)          | 266 (68.0)          |         |
| Malay                       | 486 (18.8)       | 413 (18.9)            | 73 (18.7)           |         |
| Indian                      | 152 (5.9)        | 122 (5.6)             | 30 (7.7)            |         |
| Others                      | 104 (4.0)        | 82 (3.7)              | 22 (5.6)            |         |
| Marital status              |                  |                       |                     | 0.020   |
| Never married               | 1,747 (67.7)     | 1,506 (68.8)          | 241 (61.6)          |         |
| Married                     | 572 (22.2)       | 469 (21.4)            | 103 (26.3)          |         |
| Separated/Divorced/Widowed  | 260 (10.1)       | 213 (9.7)             | 47 (12.0)           |         |
| Educational level           |                  |                       |                     | 0.005   |
| No formal / Primary         | 189 (7.3)        | 161 (7.4)             | 28 (7.2)            |         |
| Secondary                   | 305 (11.8)       | 263 (12.0)            | 42 (10.7)           |         |
| Post-secondary / Diploma    | 1,759 (68.2)     | 1,466 (67.0)          | 293 (74.9)          |         |
| University degree or higher | 318 (12.3)       | 290 (13.3)            | 28 (7.2)            |         |
| Unknown                     | 8 (0.3)          | 8 (0.4)               | 0 (0.0)             |         |
| Occupational type           |                  |                       |                     | <0.0005 |
| Professional / executive    | 531 (20.6)       | 463 (21.2)            | 68 (17.4)           |         |
| Administrative / service    | 1,044 (40.5)     | 904 (41.3)            | 140 (35.8)          |         |
| Blue-collar worker          | 337 (13.1)       | 285 (13.0)            | 52 (13.3)           |         |
| Unemployed                  | 89 (3.5)         | 69 (3.2)              | 20 (5.1)            |         |
| Others                      | 354 (13.7)       | 302 (13.8)            | 52 (13.3)           |         |
| Unknown                     | 224 (8.7)        | 165 (7.5)             | 59 (15.1)           |         |

*(Continued)*

| <b>Characteristic</b>                           | <b>All</b><br>(n=2,579) | <b>Included</b><br>(n=2,188) | <b>Excluded</b><br>(n=391) | <b>P-value</b> |
|-------------------------------------------------|-------------------------|------------------------------|----------------------------|----------------|
| Mode of detection                               |                         |                              |                            | <0.0005        |
| Voluntary screening                             | 498 (19.3)              | 452 (20.7)                   | 46 (11.8)                  |                |
| Medical care                                    | 1,189 (46.1)            | 1,001 (45.7)                 | 188 (48.1)                 |                |
| Routine programmatic HIV screening <sup>‡</sup> | 724 (28.1)              | 615 (28.1)                   | 109 (27.9)                 |                |
| Others                                          | 168 (6.5)               | 120 (5.5)                    | 48 (12.3)                  |                |
| Mode of HIV transmission                        |                         |                              |                            | <0.0005        |
| Homosexual/bisexual                             | 1,478 (57.3)            | 1,287 (58.8)                 | 191 (48.8)                 |                |
| Heterosexual                                    | 1,101 (42.7)            | 901 (41.2)                   | 200 (51.2)                 |                |
| Type of sexual partners                         |                         |                              |                            | <0.0005        |
| Regular only                                    | 301 (11.7)              | 246 (11.2)                   | 55 (14.1)                  |                |
| Regular and casual only                         | 1,583 (61.4)            | 1357 (62.0)                  | 226 (57.8)                 |                |
| Sex workers and social escorts                  | 677 (26.3)              | 576 (26.3)                   | 101 (25.8)                 |                |
| Unknown                                         | 18 (0.7)                | 9 (0.4)                      | 9 (2.3)                    |                |
| Self-reported history of STIs                   |                         |                              |                            | 0.898          |
| No                                              | 1,965 (76.2)            | 1,668 (76.2)                 | 297 (76.0)                 |                |
| Yes                                             | 614 (23.8)              | 520 (23.8)                   | 94 (24.0)                  |                |

STIs, sexually transmitted infections.

<sup>‡</sup> Routine programmatic HIV screening includes screening programmes for those with STIs, hospital inpatients and those identified through contact tracing.
